# Supplementary material for: Down syndrome-related transient abnormal myelopoiesis is attributed to a specific erythro-megakaryocytic subpopulation with GATA1 mutation
Source: PubMed Central journal article supplement — Haematologica. 2020 Apr 30;106(2):635–40. doi: 10.3324/haematol.2019.242693 (PMC7849752; doi:10.3324/haematol.2019.242693), 2020-04-30
Supplement: 2019_242693-Disclosures_Contributions.pdf [file 2019_242693-Disclosures_Contributions.pdf]

Haematologica  
HAEMATOL/2019/242693  
Version 5

Down syndrome-related transient abnormal myelopoiesis is attributed to a specific erythro-megakaryocytic subpopulation with GATA1 mutation

Yoko Nishinaka-Arai, Akira Niwa, Shiori Matsuo, Yasuhiro Kazuki, Yuwna Yakura, Takehiko Hiroma, Tsutomu Toki, Tetsushi Sakuma, Takashi Yamamoto, Etsuro Ito, Mitsuo Oshimura, Tatsutoshi Nakahata, and Megumu K. Saito

Disclosures: This work was supported by grants from the Ministry of Health, Labour and Welfare of Japan, Ministry of Education, Culture, Sports, Science and Technology of Japan, Japan Society for the Promotion of Science (JSPS) Research Fellowships for Young Scientists [Y.N.A.], KAKENHI Grant Number 19K17358 [Y.N.A.], KAKENHI Grant Number 25221308 [M.O.] and KAKENHI Grant Number 16K10026 [A.N.], Regional Innovation Support Program from the Ministry of Education, Culture, Sports, Science and Technology of Japan [M.O. and Y.K.], the Leading Project of the Ministry of Education, Culture, Sports, Science and Technology [T.N.], the Funding Program for World-Leading Innovative Research and Development on Science and Technology of the Japan Society for the Promotion of Science [T.N. and M.K.S.], CREST [T.N.], the Core Center for iPS Cell Research of Research Center Network for Realization of Regenerative Medicine from the Japan Agency for Medical Research and Development (AMED) [T.N. and M.K.S.], the Program for Intractable Diseases Research utilizing Disease-specific iPS cells of AMED (17935423) [Y.N.A., T.N. and M.K.S.], and Practical Research Project for Rare/Intractable Diseases of AMED (17930095) [M.K.S.].

Contributions: Y.N.A. and A.N. designed and performed experiments and analyzed data. S.M. performed experiments. Y.K., Y.Y. and M.O. provided Ts21-KhES1 cells and contributed to scientific discussion. T.S. and T.Y. designed and made plasmids for gene editing. T.H., T.T. and E.I. obtained informed consent from a patient and harvested primary cells. T.N. and M.K.S. supervised the project and experimental design; and Y.N.A., A.N. and M.K.S. wrote the paper.
