# Supplementary material for: Down syndrome-related transient abnormal myelopoiesis is attributed to a specific erythro-megakaryocytic subpopulation with GATA1 mutation
Source: PubMed Central journal article supplement — Haematologica. 2020 Apr 30;106(2):635–40. doi: 10.3324/haematol.2019.242693 (PMC7849752; doi:10.3324/haematol.2019.242693), 2020-04-30
Supplement: 2019_242693_ARAI_SUPPL.pdf [file 2019_242693_ARAI_SUPPL.pdf]

**Down syndrome-related transient abnormal myelopoiesis is attributed to a specific erythro-megakaryocytic subpopulation with GATA1 mutation**

Yoko Nishinaka-Arai,<sup>1,2\*</sup> Akira Niwa,<sup>1\*</sup> Shiori Matsuo,<sup>1</sup> Yasuhiro Kazuki,<sup>3,4</sup> Yuwna Yakura,<sup>3</sup> Takehiko Hiroma,<sup>5</sup> Tsutomu Toki,<sup>6</sup> Tet-sushi Sakuma,<sup>7</sup> Takashi Yamamoto,<sup>7</sup> Etsuro Ito,<sup>6</sup> Mitsuo Oshimura,<sup>3</sup> Tatsutoshi Nakahata<sup>8</sup> and Megumu K. Saito<sup>1</sup>

<sup>1</sup>Department of Clinical Application, Center for iPS cell Research and Application, Kyoto University, Kyoto; <sup>2</sup>Department of Human Health Sciences, Graduate School of Medicine, Kyoto University, Kyoto; <sup>3</sup>Chromosome Engineering Research Center, Tottori University, Tottori; <sup>4</sup>Division of Genome and Cellular Functions, Department of Molecular and Cellular Biology, School of Life Science, Faculty of Medicine, Tottori University, Tottori; <sup>5</sup>Perinatal Medical Center, Nagano Children's Hospital, Nagano; <sup>6</sup>Department of Pediatrics, Hirosaki University Graduate School of Medicine, Hirosaki; <sup>7</sup>Division of Integrated Sciences for Life, Graduate School of Integrated Sciences for Life, Hiroshima University, Hiroshima and <sup>8</sup>Drug Discovery Technology Development Office, Center for iPS cell Research and Application, Kyoto University, Kyoto, Japan

\*YNA and AN contributed equally as co-first authors

Correspondence: MEGUMU K. SAITO - [msaito@cira.kyoto-u.ac.jp](mailto:msaito@cira.kyoto-u.ac.jp)

AKIRA NIWA - [akiranw@cira.kyoto-u.ac.jp](mailto:akiranw@cira.kyoto-u.ac.jp)

doi:10.3324/haematol.2019.242693

## Supplemental Materials and methods

### Establishment of TAM-iPS

To establish a PSC-based *in vitro* model representative of the hematological abnormalities observed in TAM, CD41<sup>+</sup> blast cells were sorted using a FACS Aria II instrument (BD Biosciences, San Jose, CA, USA). Episomal plasmid vectors carrying reprogramming factors were introduced into blasts using the Amaxa Human CD34 cell Nucleofactor Kit (Lonza, Germany). After electroporation, cells were plated on BD Falcon tissue culture plates (#3516, CORNING, New York, USA) coated with 0.25  $\mu\text{g}/\text{cm}^2$  LM511-E8, which is a recombinant short fragment of laminin 511 (#892011, Nippi, Osaka, Japan), in StemSpan-ACF medium (STEMCELL Technologies, Vancouver, BC, Canada) containing 100 ng/mL SCF (#255-SC-010, R&D), 100 ng/mL TPO (#288-TP-005, R&D), 100 ng/mL Flt-3 Ligand (#308-FK-005, R&D), 50 ng/mL IL-6 (#206-IL-010, R&D), and 10 ng/mL IL-3 (#203-IL-010, R&D). The medium was changed to StemFit AK02N medium (Ajinomoto, Tokyo, Japan) gradually.

### Maintenance of human PSCs

PSCs were maintained in StemFit AK02N medium on BD Falcon tissue culture plates coated with 0.25  $\mu\text{g}/\text{cm}^2$  LM511-E8. At each passage, the cells were treated with 0.5 x TrypLE select (#12563011, Thermo, Waltham, MA, USA) for 3 min at room temperature, harvested in AK02N medium with 10  $\mu\text{M}$  Rho-Associated Protein Kinase Inhibitor Y-27632 (#08945-71, Nacalai Tesque, Kyoto, Japan), and re-plated on plates coated with LM511-E8 at a density of 265 cells/ $\text{cm}^2$ .

### Transcription activator-like effector nucleases (TALEN) genome editing

To correct the mutation of *GATA1* gene, we used TALEN genome editing. We set the TALEN targeting site at intron 2 of *GATA1* gene and constructed TALEN plasmids using the Platinum Gate TALEN Kit (Addgene, Kit #1000000043) with a CAG promoter-driven destination vector. The right and left target sequences used are as follows: right, 5'-TCTGCACTTAACTAGGGA-3'; left, 5'-TGGAAGCTTCTCAAATGG-3'. For TALEN genome editing, PSCs were dissociated with TrypLE Select, and  $1 \times 10^6$  cells were transfected with 2  $\mu\text{g}$  of each TALEN

plasmid and 6 µg of the targeting vector plasmid in an N1 cuvette using the NEPA21 Super Electroporator (NEPAGENE) following the manufacturer's instruction. Then the PSCs were replated onto BD Falcon tissue culture plates coated with LM511-E8 with AK02N medium and 10 µM Y-27632. Cells were selected with 100 mg/mL G418 (Wako) 24 h after the transfection, and surviving clones were isolated 13 days after the drug selection. Selected clones were dissociated with TrypLE Select, and  $1 \times 10^6$  cells were transfected with Cre expression plasmid using FuGene HD Transfection Reagent (Promega) following the manufacturer's instruction. Cells were selected with 500 ng/mL puromycin (InvivoGen) 2 days after the transfection. Four days after the transfection, the surviving cells were dissociated and expanded.

### **Monolayer hematopoietic differentiation system**

First, the PSCs were plated onto LM511-E8-coated plates at a density of 2.7 to 3.6 cells/cm<sup>2</sup> and maintained as described in the previous subsection. When the undifferentiated colonies reached 750 to 1000 µm in diameter, the culture media was replaced with Essential-8 medium (#A1517001, Thermo) containing 80 ng/mL BMP4 (#314-BP-010, R&D), 80 ng/mL VEGF 165 (#293-VE-010, R&D), and 2 µM GSK-3 inhibitor CHIR99021 (#038-23101, Wako, Osaka, Japan). The media was changed every two days as follows. Day 2: Essential-6 medium (#A1516401, Thermo) containing 80 ng/mL VEGF, 25 ng/mL bFGF (#064-05381, Wako), 2 µM ALK5 inhibitor SB431542 (#031-24291, Wako), and 50 ng/mL SCF; Day 4: Stemline-II medium (#S0192, Sigma-Aldrich, St. Louis, MO, USA) containing 80 ng/mL VEGF, 50 ng/mL each of SCF, IL-6, IL-3, and Flt-3 Ligand, and 5 ng/mL TPO; and Day 6: Stemline-II containing 50 ng/mL each of SCF, IL-6, IL-3, and Flt-3 Ligand, 5 ng/mL TPO, and 10 U/mL EPO (#329871, Merk, Darmstadt, Germany). On day 9, the cells were harvested by flushing out colonies with PBS and filtering them through a 40 µm cell strainer. The collected cells were adjusted to  $1 \times 10^4$  cells/cm<sup>2</sup> and transferred to lineage-specific suspension culture, which consisted of Stemline-II medium with 50 ng/mL each of SCF and IL-6, and either 10 U/mL EPO (for erythroid differentiation) or 20 ng/mL TPO (for megakaryocytic differentiation). On day 13, half the culture volume of fresh media containing 150 ng/mL SCF and either 30 U/mL EPO (for erythroid lineage) or 60 ng/mL TPO (for megakaryocytic lineage) was added to the culture.

### **Progenitor assay**

For the progenitor assay, each HPC subpopulation sorted on day 9 was adjusted to  $5 \times 10^4$  cells/mL and maintained under the appropriate lineage-specific suspension culture condition. After one week, the cells were counted and subjected to cell surface marker analysis.

### **RNA extraction and real-time quantitative RT-PCR**

RNA samples were initially prepared using silica gel membrane-based spin-columns (RNeasy Kit; Qiagen, Valencia, CA, USA) following the manufacturer's instructions. Extracted RNAs were subjected to reverse transcription followed by cDNA amplification following a previously reported method with minimal modification<sup>1, 2</sup>. Predesigned assays were used for the targeted detection of hematopoietic differentiation-related genes (PrimeTime predesigned qPCR assays; Integrated DNA Technologies, Coralville, IA, USA; see Supplemental Table 4), and quantitative RT-PCR experiments were performed with the StepOnePlus™ Real-Time PCR System (Applied Biosystems, Foster City, CA, USA) using FastStart Universal Probe Master (#04913949001, Roche, Basel, Switzerland) following the manufacturer's instructions. Quantitative assessment of the gene expressions was performed using the standard  $\Delta$ CT method. A combination of genes including GUSB, HPRT1, PGK1, ACTB, GAPDH, TBP, B2M, and PPIA served as multiple references.

### **Analysis of real-time PCR data**

For principle component analysis (PCA), data sets were filtered by the criterion requiring positive values in at least one sample and subjected to variance-stabilizing transformation and interquartile range filtering, followed by upper-quartile normalization. Next, individual analyses were performed in R using the `prcomp` function after removing unwanted variations between clones by applying the open-source package "RUV-seq"<sup>3</sup>, and the results were visualized by the "Scatterplot3D" package obtained from the Bioconductor Project. Gene sets specifically relevant to the phenotypes of interest were extracted according to the correlations of the factor loadings between each gene and phenotype in a factorical space given in the PCAs, in which each phenotype was assigned as categorical data<sup>4</sup>. GENEMANIA<sup>5</sup> and ReactomeFI<sup>6</sup> followed by ClueGO<sup>7</sup> plugin in Cytoscape (<http://www.cytoscape.org>) were used to visualize the network.

### **Ethics**

Peripheral blood blast cells used for the iPSC generation were obtained from a Down syndrome patient (ID: CiRA12345 at Kyoto University and 778 at Hirosaki University) with written informed consent from the patient's guardians in accordance with the Declaration of Helsinki. The use of human ESCs was approved by the Ministry of Education Culture, Sports, Science and Technology of Japan (MEXT). This study was approved by the Ethics Committee and the recombinant DNA Experiments Safely Committee of Kyoto University. All methods were performed in accordance with the relevant guidelines and regulations.

### **May-Giemsa staining and microscopic observation**

Phase contrast images of the culture were obtained by using BIOREVO BZ-9000 (Keyence) through a CFI Plan Fluor DL 4x objective lens (Nikon). For the microscopic observations of blood cells, floating cells were centrifuged onto PLATINUMPRO glass slides (Matsunami glass, Osaka, Japan) by using a Shandon Cytospin 4 Cytocentrifuge (Thermo, Pittsburgh, PA) and analyzed by BIOREVO BZ-9000 after May-Grunwald and Giemsa staining (Merck Millipore). A PlanApo 40x/0.95 objective (Nikon) and the BZ-II Viewer software program (Keyence) were used for the image acquisition.

### **Chromosome analysis**

PSCs were cultured on 6-cm dishes until confluent and fixed with KaryoMAX (Thermo). Q-banding analyses were performed at Chromocenter (Kobe, Japan).

### **Sanger sequencing**

Genomic DNA was extracted from the cells by using the PureLink Genomic DNA Kit (Invitrogen, Carlsbad, CA, USA) and subjected to PCR with the primers 5' -TTCTGAGAAAGTTAGAGGGCAAGATACAACAG-3' (forward) and 5' -GTACAGGGGTTCTATCTGGTATAAGTTTCTT-3' (reverse). After treatment with USB<sup>®</sup> ExoSAP-IT (Affymetrix, SC, CA), the amplicons were applied for Sanger sequencing, which was performed with the BigDye Terminator<sup>®</sup> v3.1 Cycle Sequencing Kit (Applied Biosystems, Carlsbad, CA). The products were

purified using the BigDye XTerminator<sup>®</sup> Purification Kit (ThermoFisher) and read by a 3500xL Sequencer (Applied Biosystems). Data were analyzed using Codon Code Aligner software (CodonCode Corporation) and 4Peaks (A. Griekspoor and Tom Groothuis).

### **Flow cytometry and antibodies**

Flow cytometric analyses and cell sorting were performed using a FACS AriaII and FlowJo software (Flowjo LLC, Ashland, OR, USA). The following antibodies were used: BV421-conjugated anti-human CD235a (#562938) and BV605-conjugated anti-human CD34 (#343530), FITC-conjugated anti-human CD45 (#304006, BD Horizon<sup>™</sup>, San Diego, CA, USA), and PE-conjugated anti-human CD42b (#303906), APC-conjugated anti-human CD71 (#334108), Alexa Flour<sup>®</sup> 647-conjugated anti-human CD309 (#338909), PE-Cy7-conjugated anti-human CD43 (#343208), APC-Cy7-conjugated anti-human CD41 (#303716), and PerCP-Cy5.5-conjugated anti-human CD11b (#301328), which were all purchased from BioLegend (San Diego, CA, USA).

### **Statistics analyses**

Experiments were repeated at least 3 times independently. Values are described as the mean  $\pm$  standard deviation (SD). Data were compared with Student's t test and the Pearson correlation using GraphPad Prism (La Jolla, CA, USA). The alpha level of all tests or the p value was set to 0.05.

## Supplemental references

1. Kurimoto K, Yabuta Y, Ohinata Y, et al. An improved single-cell cDNA amplification method for efficient high-density oligonucleotide microarray analysis. *Nucleic acids research*. 2006;34(5):e42.
2. Ohta R, Niwa A, Taniguchi Y, et al. Laminin-guided highly efficient endothelial commitment from human pluripotent stem cells. *Scientific reports*. 2016;6:35680.
3. Risso D, Ngai J, Speed TP, et al. Normalization of RNA-seq data using factor analysis of control genes or samples. *Nature biotechnology*. 2014;32(9):896-902.
4. Kolenikov S. AG. The Use of Discrete Data in PCA: Theory, Simulations, and Applications to Socioeconomic Indices. *Meas Eval wp*. 2005:04-85  
SRC - BaiduScholar.
5. Montojo J, Zuberi K, Rodriguez H, et al. GeneMANIA Cytoscape plugin: fast gene function predictions on the desktop. *Bioinformatics (Oxford, England)*. 2010;26(22):2927-2928.
6. Wu G, Haw R. Functional Interaction Network Construction and Analysis for Disease Discovery. *Methods in molecular biology (Clifton, NJ)*. 2017;1558:235-253.
7. Bindea G, Mlecnik B, Hackl H, et al. ClueGO: a Cytoscape plug-in to decipher functionally grouped gene ontology and pathway annotation networks. *Bioinformatics (Oxford, England)*. 2009;25(8):1091-1093.

# Supplemental Figure 1

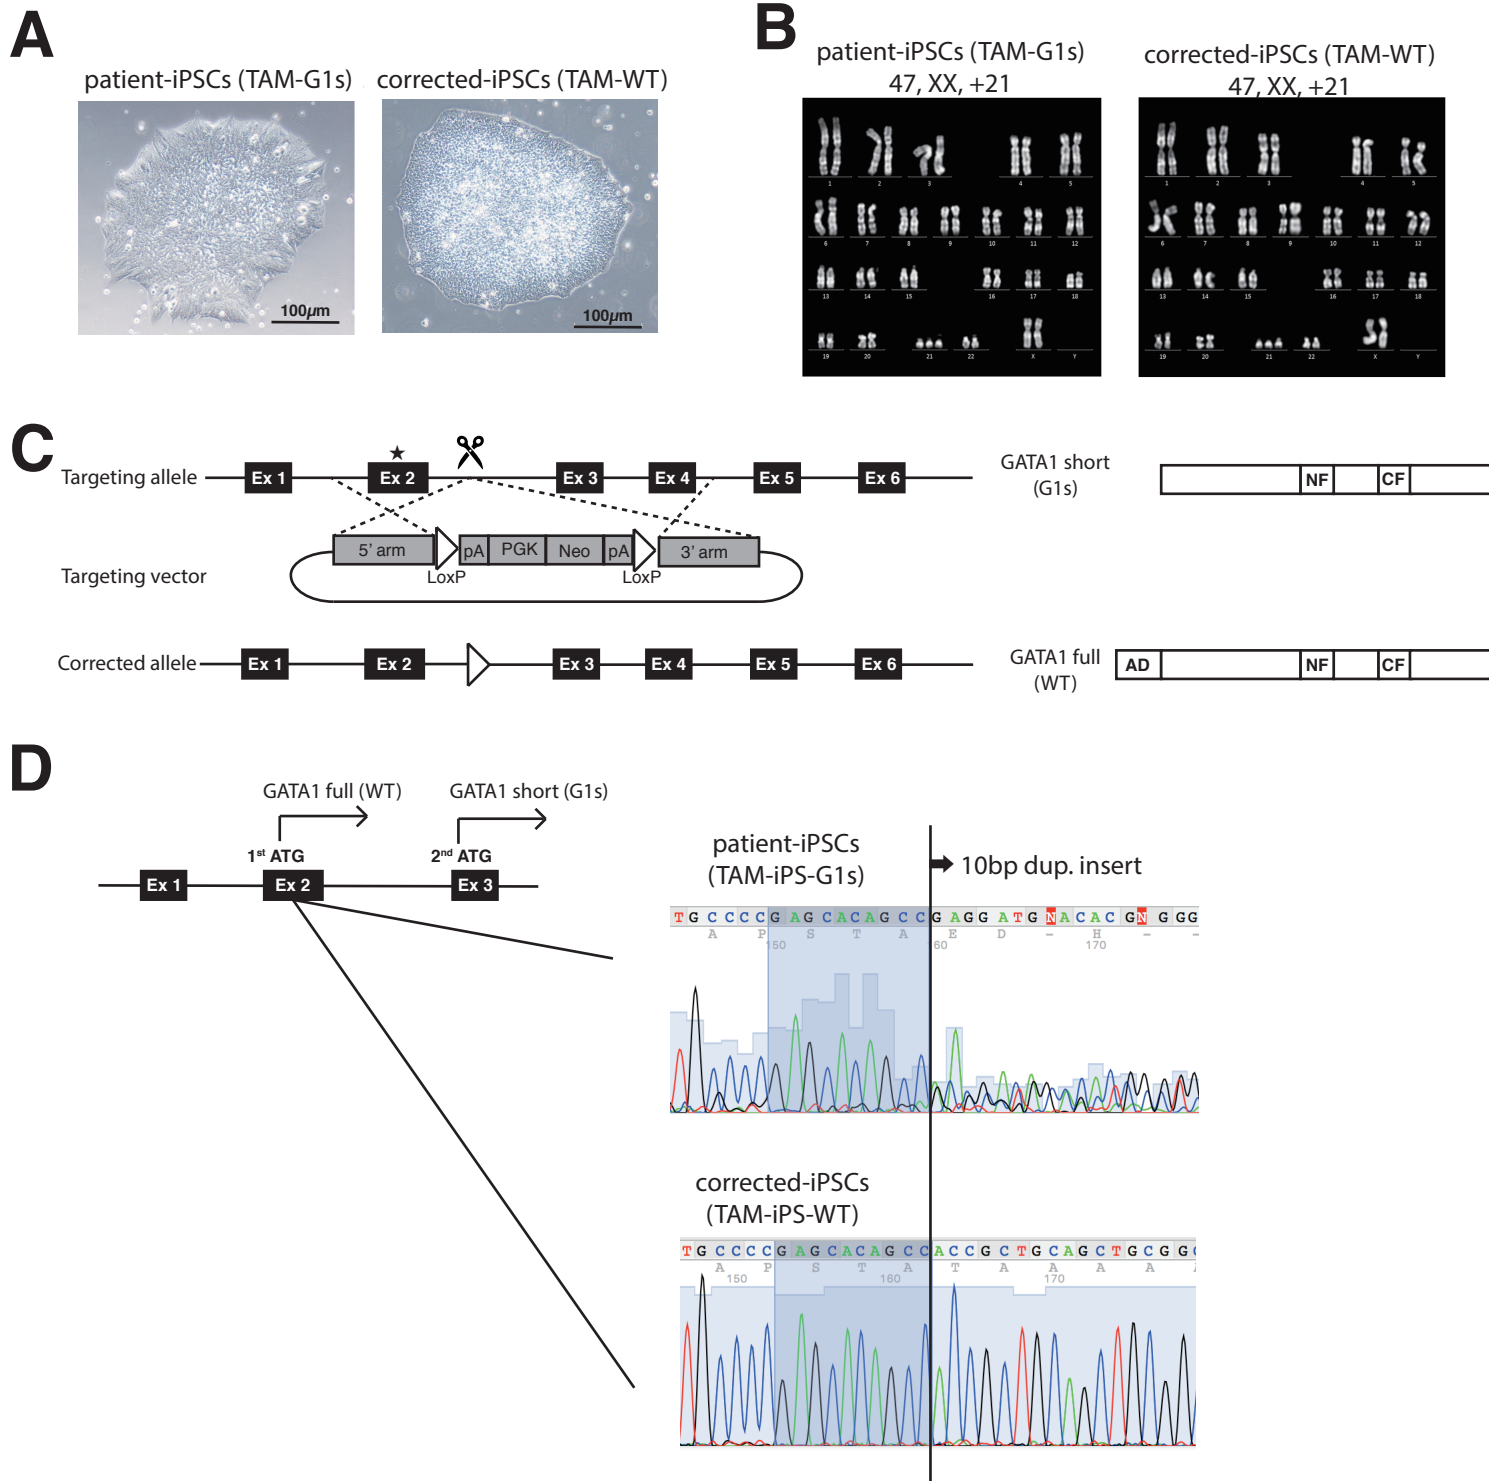



**Supplemental Figure 1. Establishment of isogenic iPSC panels from DS-TAM patient primary blood cells**

(A) Morphology (phase contrast imaging) and (B) chromosomal analysis (Q-banding) of established iPSCs before (left panel) and after (right panel) gene correction. Scale bars, 100  $\mu\text{m}$ . (C) Schema of the gene correction of *GATA1* mutation using TALEN-mediated gene editing. (D) Representative chromatograph of Sanger sequencing of *GATA1* gene from iPSCs before (upper panel) and after (lower panel) the gene correction.

# Supplemental Figure 2

**A**

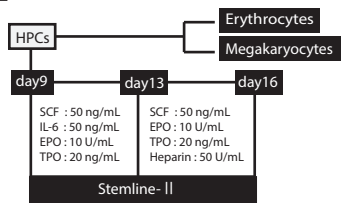

**B**

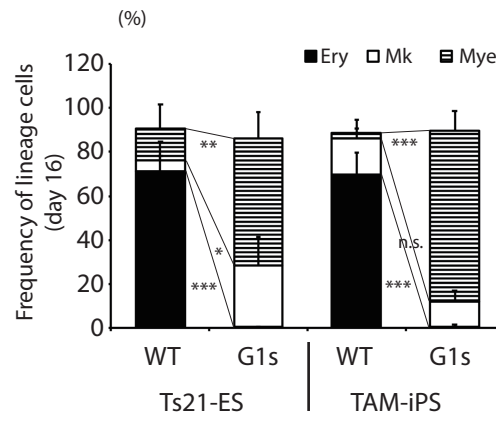

**C**

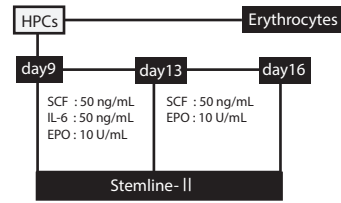

**D**

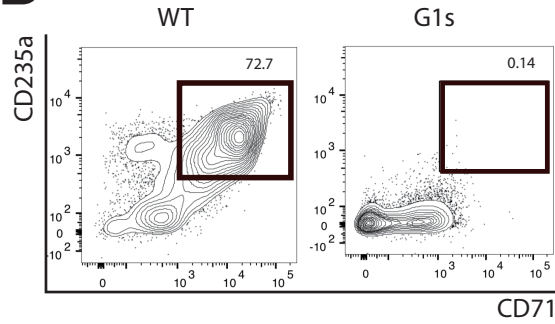

**E**

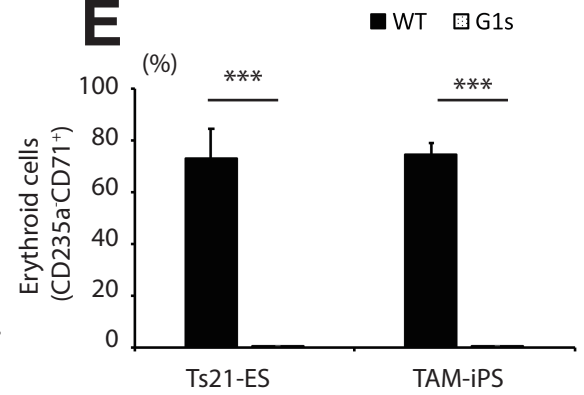

**F**

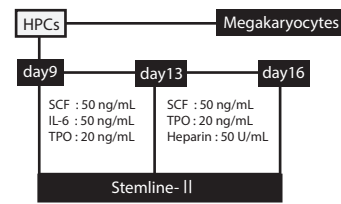

**G**

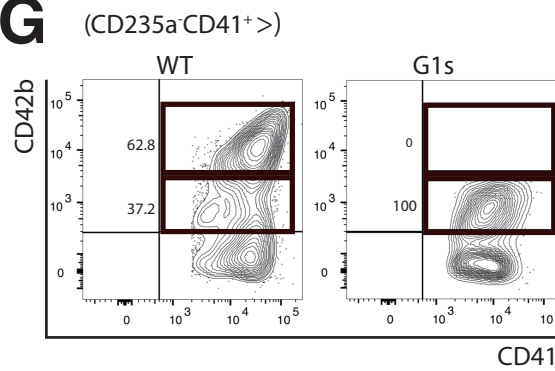

**H**

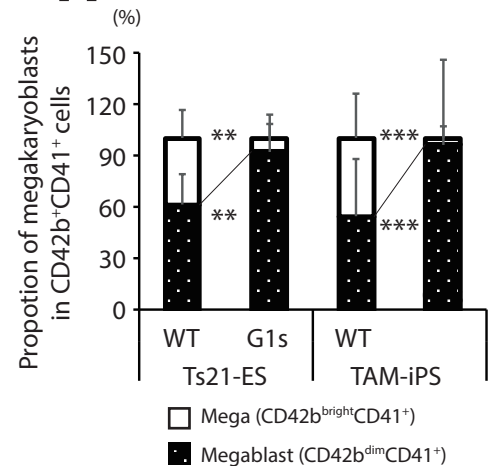

## Supplemental Figure 2. Difference in hematopoietic specification between WT and G1s Ts21-PSCs

(A) Schematic process for erythroid-megakaryocytic differentiation from hematopoietic progenitor cells. (B) Percentages of erythroid-, megakaryocytic-, and myeloid-lineage commitment according to the differentiation protocol shown in (A). *P* values compare Ery (erythrocytes), Mk (megakaryocytes), and Mye (myeloids) between WT and G1s Ts21-ESCs: < 0.0001, 0.0131, and 0.0016, respectively; and between WT and G1s TAM-iPSCs: < 0.0001, 0.3858, and < 0.0001, respectively. These differences in hematopoiesis were not recovered even under conditions specifically designed to induce erythroid (C-E) or megakaryocytic lineages (F-H). (C) Protocol for erythroid-specific differentiation. (D) Representative FACS panel and (E) percentages of erythroid cells. Dead cells (DAPI positive) were excluded from the analysis. *P* values compare Ery in erythroid lineage-inducing condition between WT and G1s Ts21-ESCs, < 0.0001, and between WT and G1s TAM-iPSCs, < 0.0001. (F) Protocol for megakaryocyte-specific differentiation. (G) Representative FACS panel and (H) percentage of megakaryocytic cells. While megakaryocytic cells from the WT lines contained both CD42b<sup>dim</sup> (immature) and CD42b<sup>bright</sup> (more mature) populations, the G1s lines showed only CD42b<sup>dim</sup> cells, which corresponds to the phenotype seen in the primary blood cells of patients with TAM. Dead cells (DAPI positive) were excluded from the analysis. *P* values compare Mega (megakaryocytes) and Megablast (megakaryoblasts) in megakaryocytic lineage-inducing condition between WT and G1s Ts21-ESCs, 0.0029, and between WT and G1s TAM-iPSCs, 0.0008. Student's t-test. Data are shown as the mean + standard deviation (SD). \**P* < .05, \*\**P* < .01, \*\*\**P* < .001; n.s, not significant. (*n* = 4-7).

# Supplemental Figure 3

## A

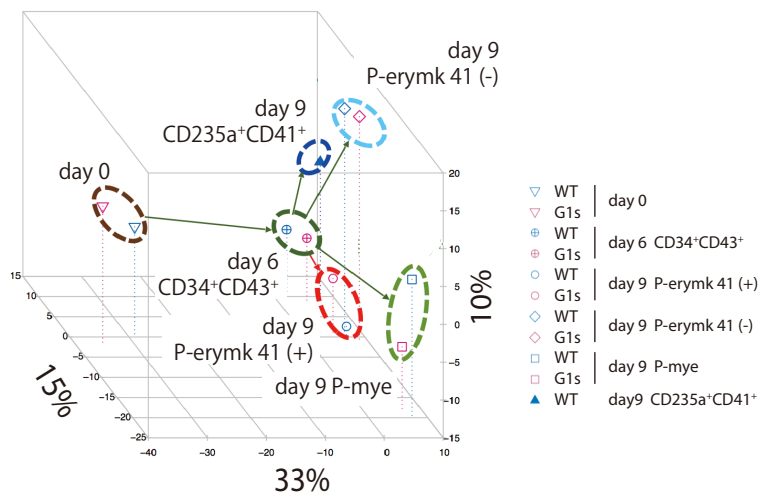

## B

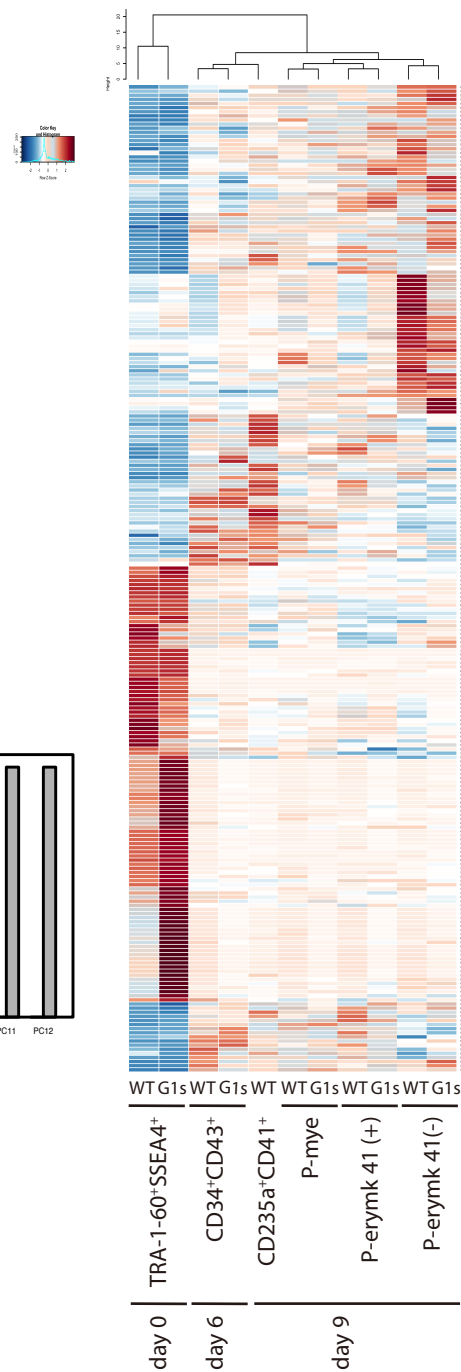

## C

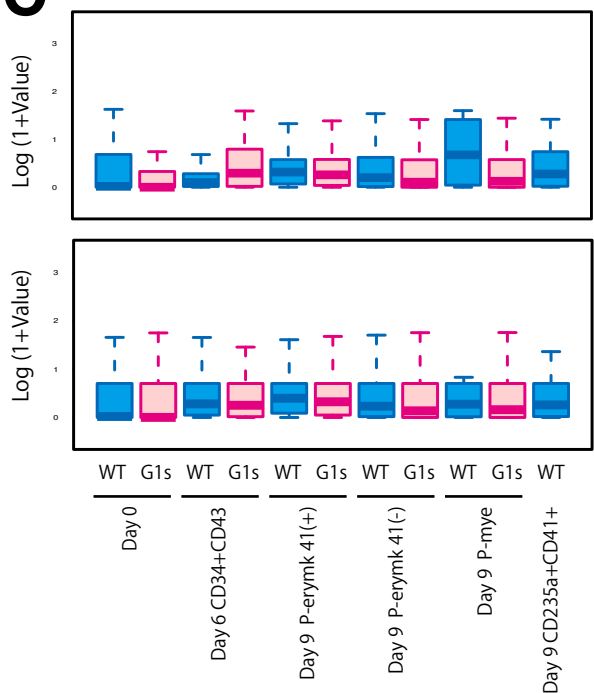

## D

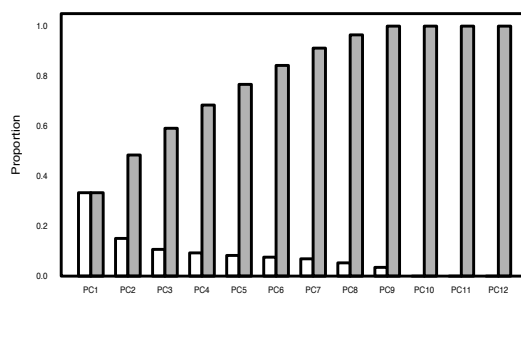

## E

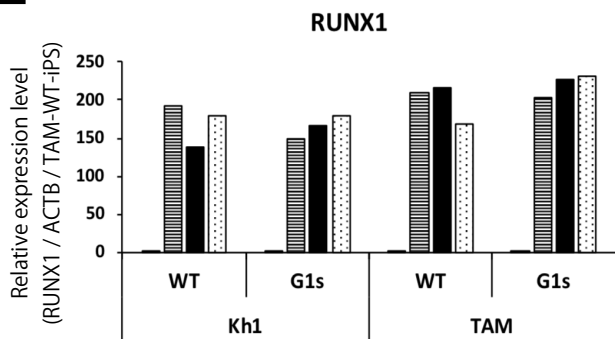

## F

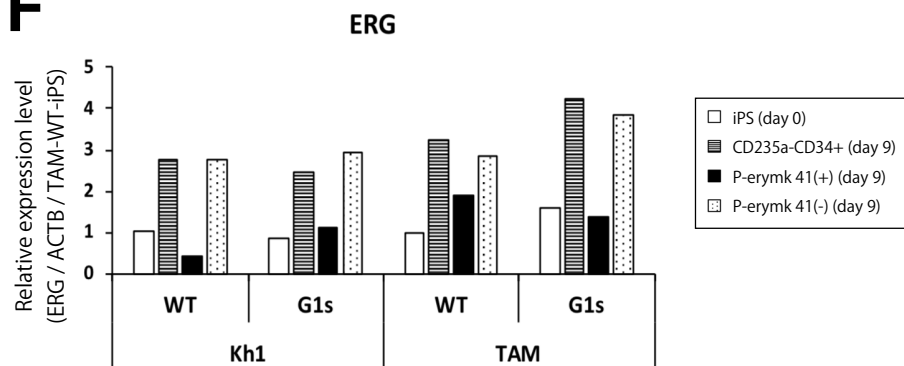

### **Supplemental Figure 3. Traced differentiation expression profiles using hematopoiesis-focused PCR array**

(A-B) Integrative analysis of the expression profiles using hematopoiesis-focused real-time PCR arrays outlined the transition of gene expression profiles during the differentiation of WT- and G1s-clones and depicted by principal component analysis (A) and a heatmap (B). Data from WT and G1s Ts21-ESCs are shown. (C) Box plots of relative log expressions for unnormalized (upper) and normalized (lower) values. The bottom and top of the boxes indicate the first and third quartiles, respectively; thick lines inside the boxes indicate the medians. (D) Chart of the variance proportion (white) and cumulative variance proportion (gray). (E-F) Relative expression levels of representative hematopoietic genes RUNX1 (E) and ERG (F). These data were analyzed using  $\Delta\Delta\text{Ct}$  methods normalized by the ACTB expression level in each sample and gene expression level in WT TAM-iPSCs (day 0).

# Supplemental Figure 4

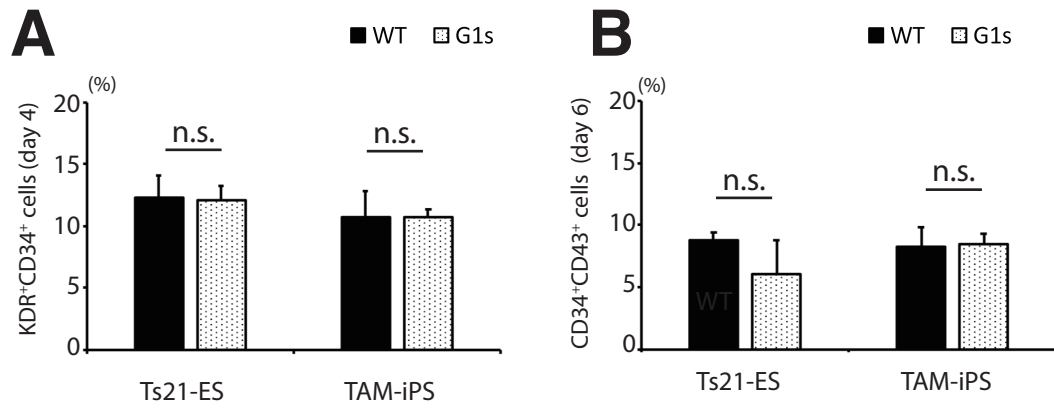

**Supplemental Figure 4. Mesodermal and early hematopoietic differentiation efficacy**

(A-B) Percentages of (A)  $KDR^+CD34^+$  mesodermal (Day 4) and (B)  $CD34^+CD43^+$  hematopoietic (Day 6) progenitors.

# Supplemental Figure 5

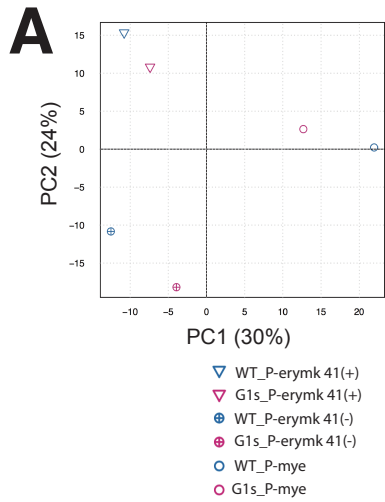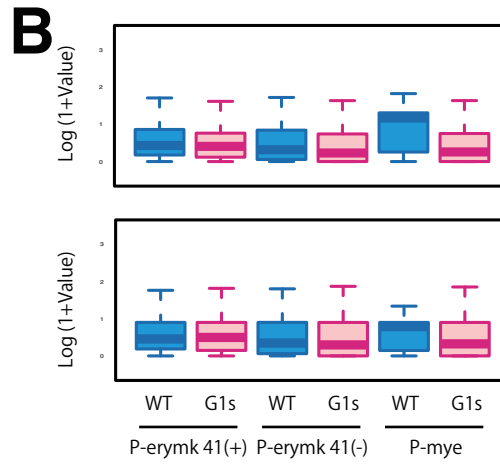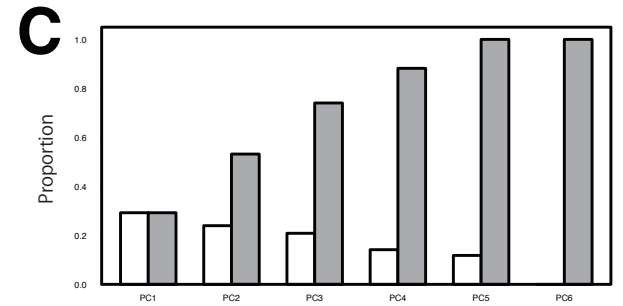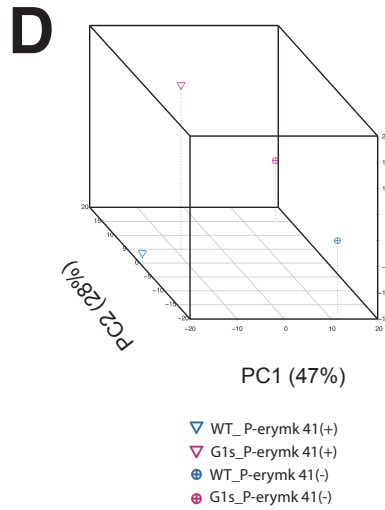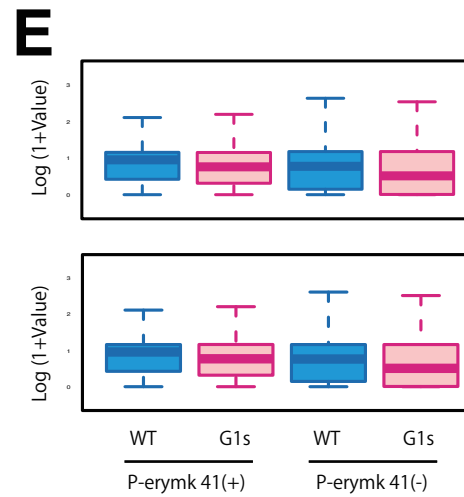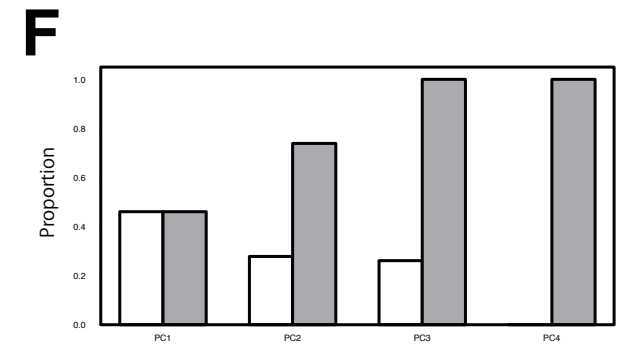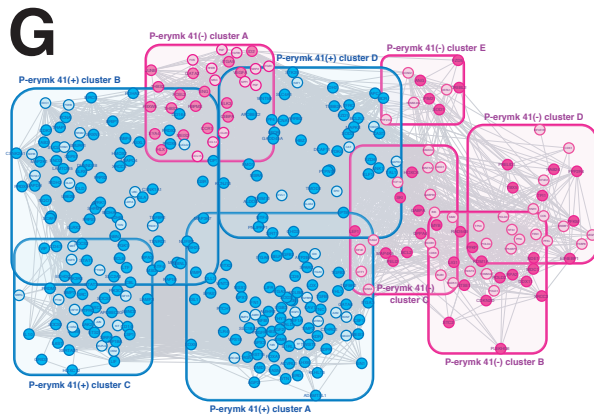

**H**

| Cluster            | Lineage specification |     |    |     | GO ID       | GO term                                                                | Group P-value Corrected with Bonferroni step down |
|--------------------|-----------------------|-----|----|-----|-------------|------------------------------------------------------------------------|---------------------------------------------------|
|                    | Pro                   | Ery | Mk | Mye |             |                                                                        |                                                   |
| P-erymk 41(+)<br>A |                       |     |    |     | GO: 0010935 | regulation of macrophage cytokine production                           | 0.02807078                                        |
|                    |                       |     |    |     | GO: 0002719 | negative regulation of cytokine production involved in immune response | 0.030283099                                       |
| P-erymk 41(+)<br>B |                       |     |    |     | GO: 0002756 | MyD88-independent toll-like receptor signaling pathway                 | 0.006458183                                       |
|                    |                       |     |    |     | GO: 0002755 | MyD88-dependent toll-like receptor signaling pathway                   | 0.007385797                                       |
|                    |                       |     |    |     | GO: 0070423 | nucleotide-binding oligomerization domain containing signaling pathway | 0.007385797                                       |
|                    |                       |     |    |     | GO: 0002223 | stimulatory C-type lectin receptor signaling pathway                   | 0.020412957                                       |
|                    |                       |     |    |     | GO: 0060218 | hematopoietic stem cell differentiation                                | 0.0024106535                                      |
| P-erymk 41(+)<br>C |                       |     |    |     | GO: 0030888 | regulation of B cell proliferation                                     | 0.01963206                                        |
|                    |                       |     |    |     | GO: 0060334 | regulation of interferon-gamma-mediated signaling pathway              | 0.005517673                                       |
|                    |                       |     |    |     | GO: 1903708 | positive regulation of hematopoiesis                                   | 0.070336045                                       |
| P-erymk 41(+)<br>D |                       |     |    |     | GO: 0030218 | erythrocyte differentiation                                            | 9.76476E-06                                       |
|                    |                       |     |    |     | GO: 0043249 | erythrocyte maturation                                                 | 0.000428154                                       |
|                    |                       |     |    |     | GO: 0061515 | myeloid cell development                                               | 0.001676536                                       |
|                    |                       |     |    |     | GO: 0030219 | megakaryocyte differentiation                                          | 0.016272944                                       |
|                    |                       |     |    |     | GO: 0045639 | positive regulation of myeloid cell differentiation                    | 0.017309068                                       |

**I**

| Cluster            | Lineage specification |     |    |             | GO ID                                                 | GO term                                     | Group P-value Corrected with Bonferroni step down |
|--------------------|-----------------------|-----|----|-------------|-------------------------------------------------------|---------------------------------------------|---------------------------------------------------|
|                    | Pro                   | Ery | Mk | Mye         |                                                       |                                             |                                                   |
| P-erymk 41(-)<br>A |                       |     |    |             | GO: 0002573                                           | Myeloid leukocyte differentiation           | 3.36959E-05                                       |
|                    |                       |     |    |             | GO: 1903708                                           | positive regulation of hematopoiesis        | 0.001718853                                       |
|                    |                       |     |    |             | GO: 0060319                                           | Primitive erythrocyte differentiation       | 0.001822897                                       |
|                    |                       |     |    |             | GO: 0060754                                           | Positive regulation of mast cell chemotaxis | 0.00377464                                        |
|                    |                       |     |    |             | GO: 0030225                                           | Macrophage differentiation                  | 0.008782239                                       |
|                    |                       |     |    |             | GO: 0030316                                           | Osteoclast differentiation                  | 0.009006904                                       |
|                    |                       |     |    |             | GO: 1902105                                           | Regulation of leukocyte differentiation     | 0.010426746                                       |
| P-erymk 41(-)<br>C |                       |     |    |             | GO: 0045637                                           | Regulation of myeloid cell differentiation  | 0.029841227                                       |
|                    |                       |     |    |             | GO: 0046632                                           | Alpha-beta T cell differentiation           | 0.011070477                                       |
|                    |                       |     |    |             | GO: 0042093                                           | T-helper cell differentiation               | 0.024089469                                       |
|                    |                       |     |    | GO: 1902036 | Regulation of hematopoietic stem cell differentiation | 0.02759787                                  |                                                   |



**Supplemental Figure 5. *GATA1* mutation impacts P-erymk41(+) (CD34<sup>+</sup>CD43<sup>+</sup>CD235<sup>-</sup>CD11b<sup>-</sup>CD71<sup>+</sup>CD41<sup>+</sup>) subpopulations**

Post-hoc comparison analyses on the expression profiles identified P-erymk41(+) as a responsible population. (A-C) Principal component analysis (PCA) showing differences in the gene expression profiles of P-erymk41(+), P-erymk41(-), and P-mye subpopulations. (A) PCA highlighted differences between CD11b<sup>+</sup> and both CD11b<sup>-</sup> populations by mapping them far from each other in the PC1 direction. (B) Box plots of relative log expressions for unnormalized (upper) and normalized (lower) values. The bottom and top of the boxes indicate the first and third quartiles, respectively; thick lines inside the boxes indicate the median. (C) Chart of the variance proportion (white) and cumulative variance proportion (gray). (D) PCA showing gene expression differences in a post-hoc comparison between P-erymk41(+) and P-erymk41(-). (E) Box plots of relative log expressions for unnormalized (upper) and normalized (lower) values. The bottom and top of the boxes indicate the first and third quartiles, respectively; thick lines inside the boxes indicate the median. (F) Chart of the variance proportion (white) and cumulative variance proportion (gray). (G-I) Clustering algorithm for automated functional annotations on a weighted composite functional interaction network based on 261 genes and extracted by the correlation index > 0.58 in a factorial space given by PCA revealed that the CD11b<sup>-</sup>CD71<sup>+</sup>CD41<sup>+</sup> cells were significantly enriched for pathways related to multi-lineage differentiation, including erythroid, megakaryocytic, and myeloid differentiation, whereas CD11b<sup>-</sup>CD71<sup>+</sup>CD41<sup>-</sup> cells were enriched in pathways associated with more limited differentiation (P values corrected with Bonferroni step down < 0.03). (G) An expanded map showing the clusters of genes extracted by positive correlations (correlation index > 0.58 in 3D factorial space in the PCA shown in (D)) with P-erymk41+ (blue) and P-erymk (-) (magenta). Closed circles depict genes originally included in the PCR array. Open circles depict genes replenished by GENEMANIA. Each gene is listed in Supplementary Table 2. (H-I) The intracellular pathways specifically enriched in (H) P-erymk41(+) and (I) P-erymk41(-). GO terms with  $p < 0.05$  in Bonferroni step down analysis are listed. Closed circles in (H) and (I) show the lineage specifications indicated by the GO terms. The open circle in (I) depicts the indicated relationship with primitive erythrocyte differentiation. There are no significant GO terms for gene sets categorized to P-erymk41(-) clusters B, D or E were enriched.

# Supplemental Figure 6

## A

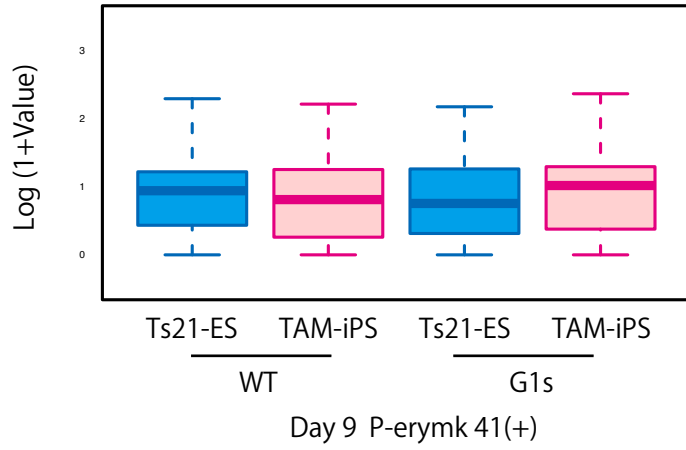

## B

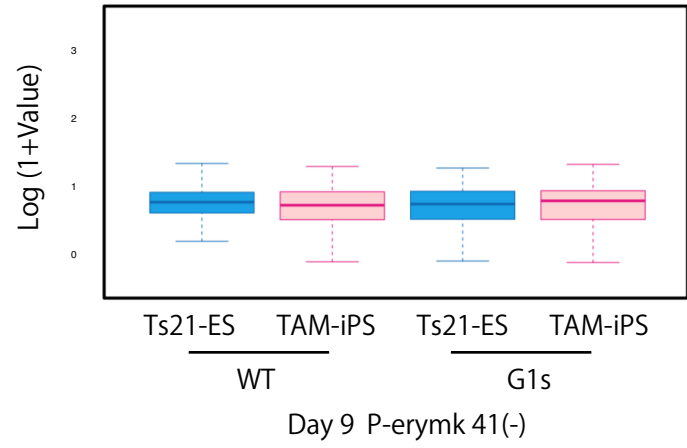

## C

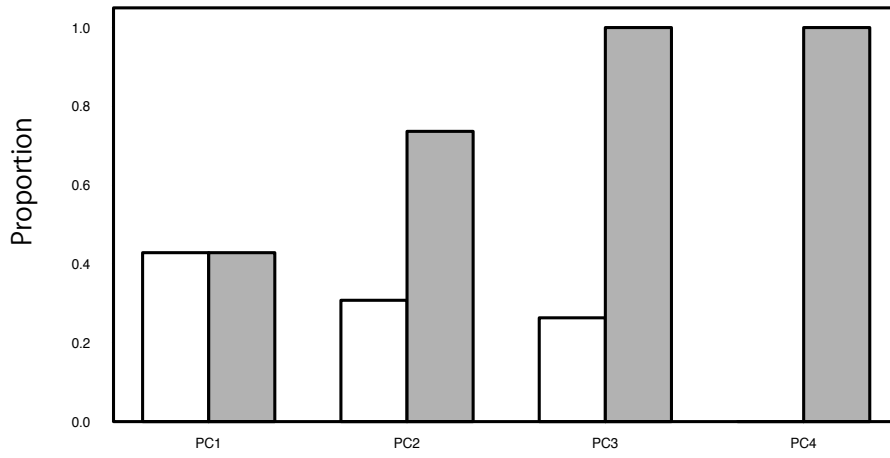

**Supplemental Figure 6. Quality check data from principal component analysis of gene expression profiles of P-erymk41(+) derived from WT- and G1s-clones on day 9.**

(A-B) Box plots of relative log expressions for unnormalized (A) and normalized (B) values. The bottom and top of the boxes indicate the first and third quartiles, respectively; thick lines inside the boxes indicate the median. (C) Chart of the variance proportion (white) and cumulative variance proportion (gray).

# Supplemental Figure 7

## A

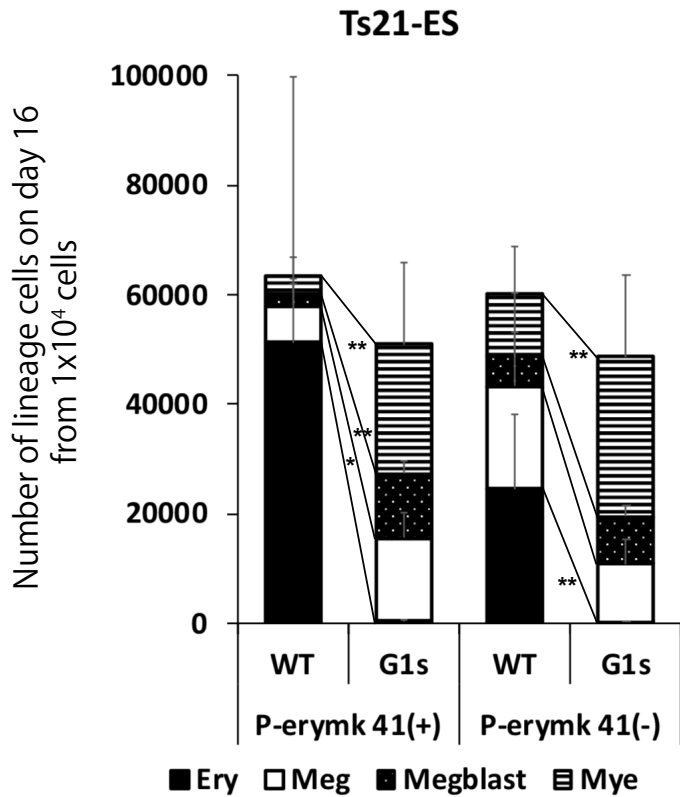

## B

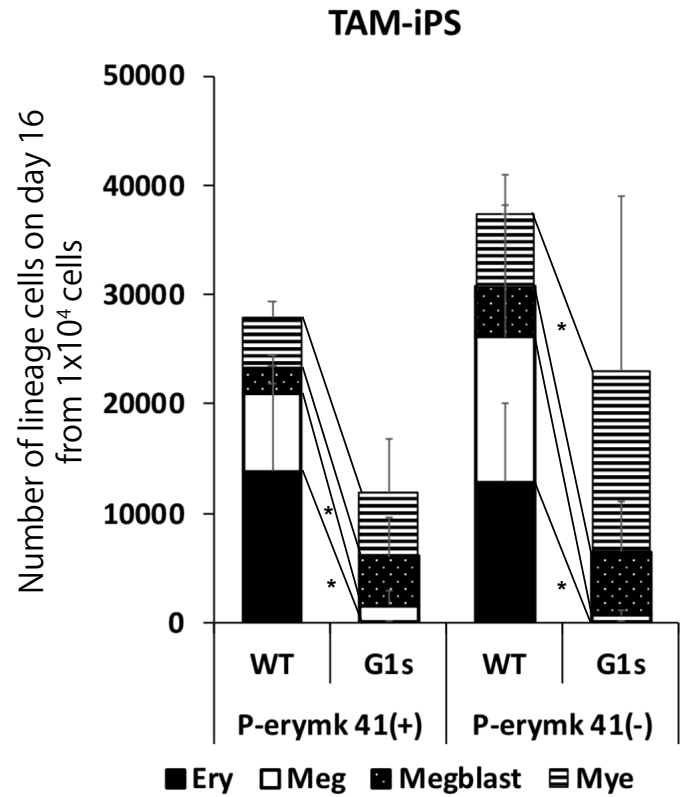

## C

**Myeloid-specific condition**

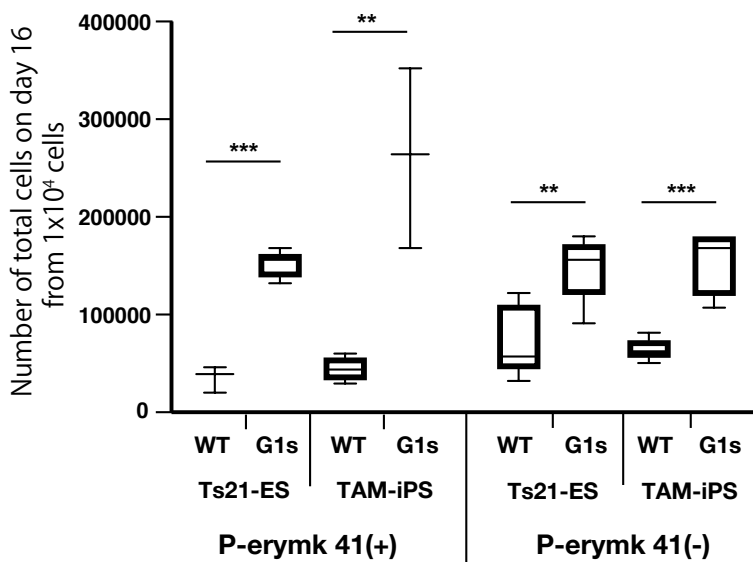

## D

**Erythro-megakaryocytic-specific condition**

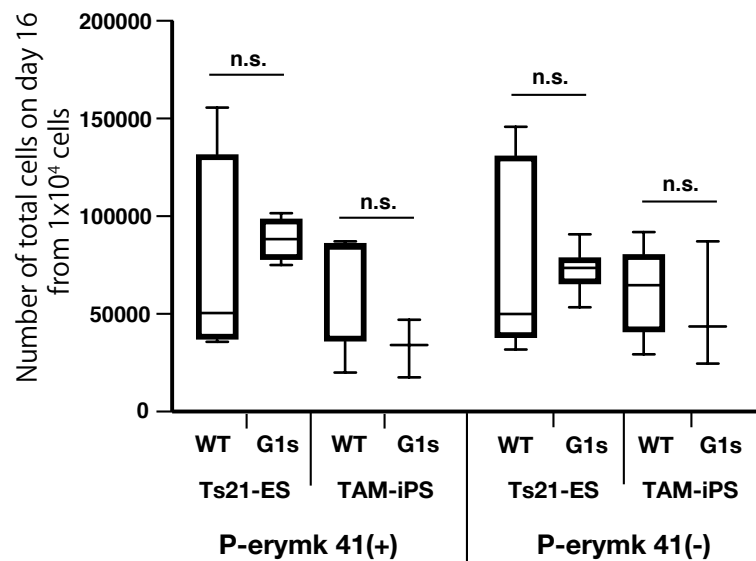

**Supplemental Figure 7. Results of the progenitor assay under erythroid-megakaryocytic lineage-specific differentiation condition.**

(A-B) Number of lineage cells derived from  $1 \times 10^4$  sorted (A) Ts21-ES and (B) TAM-iPS of each P-erymk subpopulation under erythro-megakaryocytic lineage-specific differentiation condition. Student's t-test. Data are presented as the mean + SD. \* $P < .05$ , \*\* $P < .01$ , \*\*\* $P < .001$ ; no mark, not significant. (A)  $P$  values compare Ery (erythrocytes), Meg (megakaryocytes), Megablast (magakaryoblasts), and Mye (myeloids) between Ts21-ES-WT and -G1s P-erymk 41(+): 0.0802, 0.0193, 0.0012 and 0.0022; and P-erymk 41 (-): 0.0014, 0.3376, 0.0928 and 0.0034, respectively. (n = 4-6) (B)  $P$  values compare Ery, Meg, Megablast, and Mye between TAM-iPS-WT and -G1s P-erymk 41(+): 0.0343, 0.0269, 0.0737 and 0.1912; and P-erymk 41 (-): 0.0245, 0.2098, 0.6173 and 0.0490, respectively. (n = 3-5) (C-D) Total cell number on day 16 derived from  $1 \times 10^4$  sorted Ts21-ES and TAM-iPS of each P-erymk subpopulation (C) under myeloid lineage-specific differentiation condition and (D) under erythro-megakaryocytic lineage-specific differentiation condition. Multiple comparisons using the Holm-Sidak method. Data are presented as the mean + SD. \* $P < .05$ , \*\* $P < .01$ , \*\*\* $P < .001$ ; n.s., not significant. (C)  $P$  values compare Ts21-ES, TAM-iPS between WT and G1s P-erymk 41(+):  $<0.001$  and 0.004811; and P-erymk 41 (-): 0.002213 and  $<0.0001$ , respectively. (n = 3-7) (D)  $P$  values compare Ts21-ES, TAM-iPS between WT and G1s P-erymk 41(+): 0.612962 and 0.141503; and P-erymk 41 (-): 0.950503 and 0.633504, respectively. (n = 3-6)

| <b>Assay ID</b>      | <b>Gene</b> | <b>Category</b> |
|----------------------|-------------|-----------------|
| Hs.PT.39a.22214847   | ACTB        | Control         |
| Hs.PT.58v.18759587   | B2M         | Control         |
| Hs.PT.58v.27737538   | GUSB        | Control         |
| Hs.PT.39a.22214823   | HMBS        | Control         |
| Hs.PT.58v.45621572   | HPRT1       | Control         |
| Hs.PT.39a.22214856.g | RNA18S5     | Control         |
| Hs.PT.39a.22214824   | RPLP0       | Control         |
| Hs.PT.58v.39858774   | TBP         | Control         |
| Hs.PT.58.26515729    | ABCC1       | Gene            |
| Hs.PT.58.801316      | ABL1        | Gene            |
| Hs.PT.58.19167084    | ACE         | Gene            |
| Hs.PT.56a.4625788    | ACO2        | Gene            |
| Hs.PT.56a.27778502.g | ACP5        | Gene            |
| Hs.PT.58.38874751    | ACTR1A      | Gene            |
| Hs.PT.56a.3116792    | ACVRL1      | Gene            |
| Hs.PT.58.28280494    | ADAMTSL1    | Gene            |
| Hs.PT.56a.27639918   | ADD1        | Gene            |
| Hs.PT.56a.14769146.g | ADD2        | Gene            |
| Hs.PT.56a.25211580.g | ADM         | Gene            |
| Hs.PT.56a.2555693    | AGTR1       | Gene            |
| Hs.PT.56a.27063935   | AGTR2       | Gene            |
| Hs.PT.58.39355615    | AICDA       | Gene            |
| Hs.PT.56a.3748524.g  | ALDOA       | Gene            |
| Hs.PT.56a.20260945   | ALDOB       | Gene            |
| Hs.PT.56a.39340503.g | AMHR2       | Gene            |
| Hs.PT.58.40998481    | ANAPC2      | Gene            |
| Hs.PT.58.40583280    | ANAPC4      | Gene            |
| Hs.PT.56a.38825273   | ANG         | Gene            |
| Hs.PT.56a.761468     | ANGPT1      | Gene            |
| Hs.PT.56a.1015507    | ANK1        | Gene            |
| Hs.PT.58.18822183    | ANKS1B      | Gene            |
| Hs.PT.58.4097385     | ANLN        | Gene            |
| Hs.PT.58.39900022    | AP3S1       | Gene            |
| Hs.PT.56a.24982580   | APBA1       | Gene            |
| Hs.PT.56a.3539689    | APC         | Gene            |

| <b>Assay ID</b>      | <b>Gene</b> | <b>Category</b> |
|----------------------|-------------|-----------------|
| Hs.PT.56a.19330542   | APOBEC1     | Gene            |
| Hs.PT.58.2712699     | APOBEC2     | Gene            |
| Hs.PT.58.45279514.g  | APOBEC3A    | Gene            |
| Hs.PT.58.45417356    | APOBEC3B    | Gene            |
| Hs.PT.58.45329268    | APOBEC3C    | Gene            |
| Hs.PT.58.45334940    | APOBEC3D    | Gene            |
| Hs.PT.58.27075498    | APOBEC3F    | Gene            |
| Hs.PT.58.27074917    | APOBEC3G    | Gene            |
| Hs.PT.58.3752998     | APOBEC3H    | Gene            |
| Hs.PT.58.19624591    | APOBEC4     | Gene            |
| Hs.PT.58.26144321    | APOO        | Gene            |
| Hs.PT.58.28220956    | APTX        | Gene            |
| Hs.PT.56a.39743560   | AQP2        | Gene            |
| Hs.PT.56a.38949092.g | ARRB2       | Gene            |
| Hs.PT.58.40418762    | ASH2L       | Gene            |
| Hs.PT.58.20189842    | ASXL1       | Gene            |
| Hs.PT.56a.744435.g   | ATF4        | Gene            |
| Hs.PT.56a.2596352    | ATM         | Gene            |
| Hs.PT.58.4729485     | ATN1        | Gene            |
| Hs.PT.56a.26786607   | ATOX1       | Gene            |
| Hs.PT.56a.26287743   | ATP2B4      | Gene            |
| Hs.PT.58.39287474    | AZIN1       | Gene            |
| Hs.PT.58.25390148    | B3GNT5      | Gene            |
| Hs.PT.58.38444057    | BCL11A      | Gene            |
| Hs.PT.56a.654557.g   | BCL2        | Gene            |
| Hs.PT.56a.39595693.g | BCL2L1      | Gene            |
| Hs.PT.56a.19673829.g | BCL6        | Gene            |
| Hs.PT.56a.654444     | BCR         | Gene            |
| Hs.PT.56a.15574256   | BDH1        | Gene            |
| Hs.PT.56a.1608989.g  | BIRC5       | Gene            |
| Hs.PT.56a.40556148   | BLM         | Gene            |
| Hs.PT.56a.18691455   | BMI1        | Gene            |
| Hs.PT.56a.28076895   | BMP2        | Gene            |
| Hs.PT.56a.2412580.g  | BMP4        | Gene            |
| Hs.PT.56a.19505405   | BMP6        | Gene            |

| <b>Assay ID</b>       | <b>Gene</b> | <b>Category</b> |
|-----------------------|-------------|-----------------|
| Hs.PT.56a.39649552    | BMP7        | Gene            |
| Hs.PT.58.1478116      | BNC2        | Gene            |
| Hs.PT.56a.4777107.g   | BRCA1       | Gene            |
| Hs.PT.56a.3097771.g   | BRCA2       | Gene            |
| Hs.PT.58.20043601     | BRE         | Gene            |
| Hs.PT.58.39941004     | BRIP1       | Gene            |
| Hs.PT.58.2888747      | CACNA1C     | Gene            |
| Hs.PT.56a.15372424    | CACNB2      | Gene            |
| Hs.PT.56a.24396802.g  | CALD1       | Gene            |
| Hs.PT.56a.2412346     | CALM2       | Gene            |
| Hs.PT.56a.3619634     | CAPN1       | Gene            |
| Hs.PT.56a.22796504.g  | CAST        | Gene            |
| Hs.PT.56a.27208198    | CAT         | Gene            |
| Hs.PT.56a.40058555.g  | CAV1        | Gene            |
| Hs.PT.58.40736472     | CBFB        | Gene            |
| Hs.PT.56a.25419921    | CBL         | Gene            |
| Hs.PT.58.1474749      | CCDC124     | Gene            |
| Hs.PT.58.39666925.g   | CCL27       | Gene            |
| Hs.PT.56a.39415515    | CCNA2       | Gene            |
| Hs.PT.56a.39564933    | CCNB1       | Gene            |
| Hs.PT.58.23013679     | CCNB2       | Gene            |
| Hs.PT.56a.3857509     | CCND1       | Gene            |
| Hs.PT.58.4170183      | CCND2       | Gene            |
| Hs.PT.56a.27776605    | CCNE1       | Gene            |
| Hs.PT.56a.26264979    | CCNF        | Gene            |
| Hs.PT.56a.2340964     | CCNG1       | Gene            |
| Hs.PT.56a.39916489    | CCNH        | Gene            |
| Hs.PT.56a.155787      | CCNT1       | Gene            |
| Hs.PT.56a.22530697.gs | CCNT2       | Gene            |
| Hs.PT.58.41060320.g   | CCR1        | Gene            |
| Hs.PT.56a.3118607.g   | CD14        | Gene            |
| Hs.PT.58.27365577.g   | CD164       | Gene            |
| Hs.PT.56a.20534662    | CD1D        | Gene            |
| Hs.PT.56a.27441991    | CD27        | Gene            |
| Hs.PT.56a.24708916    | CD34        | Gene            |



| <b>Assay ID</b>      | <b>Gene</b> | <b>Category</b> |
|----------------------|-------------|-----------------|
| Hs.PT.56a.38787594.g | CD36        | Gene            |
| Hs.PT.58.38755052    | CD38        | Gene            |
| Hs.PT.56a.40383339   | CD3D        | Gene            |
| Hs.PT.58.2004193     | CD44        | Gene            |
| Hs.PT.58.45656328    | CD47        | Gene            |
| Hs.PT.58.3602385     | CD48        | Gene            |
| Hs.PT.56a.38577902   | CD80        | Gene            |
| Hs.PT.58.21526437    | CD86        | Gene            |
| Hs.PT.56a.4183031    | CD9         | Gene            |
| Hs.PT.58.2690453     | CDC16       | Gene            |
| Hs.PT.58.23058352    | CDC20       | Gene            |
| Hs.PT.58.3290161     | CDC34       | Gene            |
| Hs.PT.58.21273149    | CDC42       | Gene            |
| Hs.PT.58.50433638    | CDC42EP3    | Gene            |
| Hs.PT.58.3366568     | CDC6        | Gene            |
| Hs.PT.58.723968      | CDH5        | Gene            |
| Hs.PT.58.40377349.g  | CDK1        | Gene            |
| Hs.PT.58.92978       | CDK2        | Gene            |
| Hs.PT.58.38531977    | CDK4        | Gene            |
| Hs.PT.58.24429651.g  | CDK5R1      | Gene            |
| Hs.PT.58.344323      | CDK6        | Gene            |
| Hs.PT.58.552915      | CDK7        | Gene            |
| Hs.PT.58.40874346.g  | CDKN1A      | Gene            |
| Hs.PT.58.45564663    | CDKN1B      | Gene            |
| Hs.PT.58.1677181     | CDKN1C      | Gene            |
| Hs.PT.58.1332924     | CDKN2D      | Gene            |
| Hs.PT.58.40543963    | CDKN3       | Gene            |
| Hs.PT.58.4022335.g   | CEBPA       | Gene            |
| Hs.PT.58.27185099.g  | CEBPB       | Gene            |
| Hs.PT.58.45391526    | CEBPE       | Gene            |
| Hs.PT.58.25651300    | CEBPG       | Gene            |
| Hs.PT.58.40180931    | CELF4       | Gene            |
| Hs.PT.58.4967039     | CEP57       | Gene            |
| Hs.PT.58.2105492.g   | CHCHD7      | Gene            |
| Hs.PT.58.26775087    | CHD2        | Gene            |

| <b>Assay ID</b>      | <b>Gene</b> | <b>Category</b> |
|----------------------|-------------|-----------------|
| Hs.PT.58.2748941     | CHD7        | Gene            |
| Hs.PT.58.40167907.gs | CHMP2A      | Gene            |
| Hs.PT.58.39264915    | CHMP4B      | Gene            |
| Hs.PT.58.19758297    | CHST15      | Gene            |
| Hs.PT.58.2257934     | CISH        | Gene            |
| Hs.PT.58.619686      | CKS1B       | Gene            |
| Hs.PT.58.20025774    | CKS2        | Gene            |
| Hs.PT.58.26907536    | CLU         | Gene            |
| Hs.PT.58.1854669     | CMAS        | Gene            |
| Hs.PT.58.23326343    | CNRIP1      | Gene            |
| Hs.PT.58.40301706.g  | CREB3       | Gene            |
| Hs.PT.58.15708514    | CREB5       | Gene            |
| Hs.PT.58.4941264     | CREBBP      | Gene            |
| Hs.PT.58.15018470    | CREBL2      | Gene            |
| Hs.PT.58.38532277    | CREM        | Gene            |
| Hs.PT.58.20033010    | CS          | Gene            |
| Hs.PT.58.26882150    | CSF1        | Gene            |
| Hs.PT.58.20138984    | CSF2        | Gene            |
| Hs.PT.58.27044427.g  | CSF3        | Gene            |
| Hs.PT.58.14927224    | CSF3R       | Gene            |
| Hs.PT.58.38771777    | CSNK1A1     | Gene            |
| Hs.PT.58.1852079.g   | CSNK2A1     | Gene            |
| Hs.PT.58.41117841    | CSNK2A2     | Gene            |
| Hs.PT.58.26784792.g  | CSNK2B      | Gene            |
| Hs.PT.58.19272439    | CTCF        | Gene            |
| Hs.PT.58.19885742    | CTHRC1      | Gene            |
| Hs.PT.58.38816765    | CTNNA3      | Gene            |
| Hs.PT.58.40551289    | CTNNB1      | Gene            |
| Hs.PT.58.24541956    | CUL1        | Gene            |
| Hs.PT.58.2236658     | CUL2        | Gene            |
| Hs.PT.58.25840798    | CUL3        | Gene            |
| Hs.PT.58.45496420.g  | CXCL13      | Gene            |
| Hs.PT.58.27595676.g  | CXCR4       | Gene            |
| Hs.PT.56a.1692541    | CXCR5       | Gene            |
| Hs.PT.58.2178286     | CYBB        | Gene            |

| <b>Assay ID</b>     | <b>Gene</b> | <b>Category</b> |
|---------------------|-------------|-----------------|
| Hs.PT.58.20739085   | DAAM1       | Gene            |
| Hs.PT.58.21139254   | DAB1        | Gene            |
| Hs.PT.58.21039514.g | DCAF11      | Gene            |
| Hs.PT.58.24500790   | DCTN2       | Gene            |
| Hs.PT.58.27976785   | DDB1        | Gene            |
| Hs.PT.58.39656290   | DDX11       | Gene            |
| Hs.PT.58.2292506    | DENND1B     | Gene            |
| Hs.PT.58.21163170   | DHRS3       | Gene            |
| Hs.PT.58.24277492   | DLAT        | Gene            |
| Hs.PT.58.2072159.g  | DLD         | Gene            |
| Hs.PT.58.41063402   | DLL1        | Gene            |
| Hs.PT.58.4959174    | DLL4        | Gene            |
| Hs.PT.58.24830033.g | DMD         | Gene            |
| Hs.PT.58.19667159   | DNM2        | Gene            |
| Hs.PT.58.4510223    | DNTT        | Gene            |
| Hs.PT.58.39111280   | DPPA4       | Gene            |
| Hs.PT.58.1593689    | ECHDC2      | Gene            |
| Hs.PT.58.38680333   | ECT2        | Gene            |
| Hs.PT.58.40464980   | EGLN2       | Gene            |
| Hs.PT.58.40402328   | EGR2        | Gene            |
| Hs.PT.58.21283123   | EIF4EBP1    | Gene            |
| Hs.PT.58.404879     | EIF5A       | Gene            |
| Hs.PT.58.40016354.g | ELANE       | Gene            |
| Hs.PT.58.20640730   | ELAVL2      | Gene            |
| Hs.PT.58.3792790    | ELAVL4      | Gene            |
| Hs.PT.58.25090427   | ELK3        | Gene            |
| Hs.PT.58.39031945   | EME1        | Gene            |
| Hs.PT.58.14559889   | EN1         | Gene            |
| Hs.PT.58.4962347    | ENG         | Gene            |
| Hs.PT.58.41055673   | ENO1        | Gene            |
| Hs.PT.58.3666886    | ENO2        | Gene            |
| Hs.PT.58.2400935    | ENO3        | Gene            |
| Hs.PT.58.4197119    | ENOX1       | Gene            |
| Hs.PT.58.2272120    | EP300       | Gene            |
| Hs.PT.58.2273374    | EPAS1       | Gene            |

| <b>Assay ID</b>     | <b>Gene</b> | <b>Category</b> |
|---------------------|-------------|-----------------|
| Hs.PT.58.3107098    | EPB42       | Gene            |
| Hs.PT.58.1663302.g  | EPO         | Gene            |
| Hs.PT.58.25877645   | EPOR        | Gene            |
| Hs.PT.58.39309228   | ERCC2       | Gene            |
| Hs.PT.58.1201218    | ERG         | Gene            |
| Hs.PT.58.39498189   | ETS1        | Gene            |
| Hs.PT.58.4494352    | ETS2        | Gene            |
| Hs.PT.58.1187693    | ETV6        | Gene            |
| Hs.PT.58.1073704    | EYA4        | Gene            |
| Hs.PT.56a.4466990   | FAS         | Gene            |
| Hs.PT.58.21375772.g | FBXW5       | Gene            |
| Hs.PT.58.2403159    | FBXW7       | Gene            |
| Hs.PT.58.1554556    | FEN1        | Gene            |
| Hs.PT.58.38419686   | FES         | Gene            |
| Hs.PT.58.4588674    | FGF13       | Gene            |
| Hs.PT.58.40261049   | FH          | Gene            |
| Hs.PT.58.24299493   | FHL1        | Gene            |
| Hs.PT.58.26907335   | FLI1        | Gene            |
| Hs.PT.58.39902954   | FLNA        | Gene            |
| Hs.PT.58.40906831   | FLT1        | Gene            |
| Hs.PT.58.19454325   | FLT3        | Gene            |
| Hs.PT.58.270547     | FLT3LG      | Gene            |
| Hs.PT.58.40862631   | FMO1        | Gene            |
| Hs.PT.58.40986315   | FN1         | Gene            |
| Hs.PT.58.120853     | FOSL2       | Gene            |
| Hs.PT.58.1788586    | FOXA1       | Gene            |
| Hs.PT.58.40005627   | FOXO1       | Gene            |
| Hs.PT.58.5045552.g  | FOXO3       | Gene            |
| Hs.PT.58.3947239    | FOXO4       | Gene            |
| Hs.PT.58.2596830    | FOXP2       | Gene            |
| Hs.PT.58.15373359.g | FZD1        | Gene            |
| Hs.PT.58.26203812.g | FZD2        | Gene            |
| Hs.PT.58.15465940   | FZD4        | Gene            |
| Hs.PT.58.3585264.g  | FZD5        | Gene            |
| Hs.PT.58.19704176   | FZD6        | Gene            |

| <b>Assay ID</b>      | <b>Gene</b> | <b>Category</b> |
|----------------------|-------------|-----------------|
| Hs.PT.58.27962918.g  | FZD7        | Gene            |
| Hs.PT.58.25195058    | G6PD        | Gene            |
| Hs.PT.58.19833159    | GABPA       | Gene            |
| Hs.PT.58.20049396    | GADD45A     | Gene            |
| Hs.PT.58.1794651.gs  | GADD45B     | Gene            |
| Hs.PT.58.39847030.gs | GADD45G     | Gene            |
| Hs.PT.39a.22214836   | GAPDH       | Gene            |
| Hs.PT.58.21050378    | GATA1       | Gene            |
| Hs.PT.58.961996      | GATA2       | Gene            |
| Hs.PT.58.19431110    | GATA3       | Gene            |
| Hs.PT.58.38396504    | GATA6       | Gene            |
| Hs.PT.58.2967824     | GCLC        | Gene            |
| Hs.PT.58.3375691     | GCLM        | Gene            |
| Hs.PT.58.15434635    | GFI1        | Gene            |
| Hs.PT.58.1695211     | GFI1B       | Gene            |
| Hs.PT.58.45631614.gs | GLA         | Gene            |
| Hs.PT.58.27459908    | GLRX        | Gene            |
| Hs.PT.58.27979370    | GLRX2       | Gene            |
| Hs.PT.58.4759761.g   | GP1BA       | Gene            |
| Hs.PT.58.25831595    | GPI         | Gene            |
| Hs.PT.58.39419343.g  | GPX1        | Gene            |
| Hs.PT.58.20609668.g  | GPX3        | Gene            |
| Hs.PT.58.39138777.gs | GPX4        | Gene            |
| Hs.PT.58.24566878    | GRID2       | Gene            |
| Hs.PT.58.20804834    | GRIN2B      | Gene            |
| Hs.PT.58.40111551    | GSK3B       | Gene            |
| Hs.PT.58.40027364    | GSR         | Gene            |
| Hs.PT.58.38674961    | GTF2H1      | Gene            |
| Hs.PT.58.39991985    | GTSE1       | Gene            |
| Hs.PT.58.666263.g    | GYPA        | Gene            |
| Hs.PT.58.23045743.g  | H2AFX       | Gene            |
| Hs.PT.58.1072699.gs  | HBZ         | Gene            |
| Hs.PT.58.654007      | HDAC4       | Gene            |
| Hs.PT.58.4528920     | HDAC5       | Gene            |
| Hs.PT.58.4551980     | HDAC7       | Gene            |

| <b>Assay ID</b>     | <b>Gene</b> | <b>Category</b> |
|---------------------|-------------|-----------------|
| Hs.PT.58.26676196   | HDAC9       | Gene            |
| Hs.PT.58.977759     | HDGF        | Gene            |
| Hs.PT.58.26210495   | HHEX        | Gene            |
| Hs.PT.58.534274     | HIF1A       | Gene            |
| Hs.PT.58.27232397   | HIPK1       | Gene            |
| Hs.PT.58.28341041   | HK1         | Gene            |
| Hs.PT.58.39206966   | HK2         | Gene            |
| Hs.PT.58.38936849   | HLX         | Gene            |
| Hs.PT.58.4806290    | HMOX2       | Gene            |
| Hs.PT.58.22679552   | HOXA1       | Gene            |
| Hs.PT.58.39472759.g | HOXA10      | Gene            |
| Hs.PT.58.40464941   | HOXA2       | Gene            |
| Hs.PT.58.21258578.g | HOXB2       | Gene            |
| Hs.PT.58.40865430   | HOXB4       | Gene            |
| Hs.PT.58.2318474.g  | HOXB5       | Gene            |
| Hs.PT.58.26260429   | HOXB6       | Gene            |
| Hs.PT.58.120307     | HOXB8       | Gene            |
| Hs.PT.58.38771705   | HOXB9       | Gene            |
| Hs.PT.58.40823776   | HOXC10      | Gene            |
| Hs.PT.58.3566247    | HOXC12      | Gene            |
| Hs.PT.58.2597303.g  | HOXC4       | Gene            |
| Hs.PT.58.39704010   | HOXC6       | Gene            |
| Hs.PT.58.v.45621572 | HPRT1       | Gene            |
| Hs.PT.58.1363648.g  | ICAM4       | Gene            |
| Hs.PT.58.45682625.g | ID1         | Gene            |
| Hs.PT.58.38958353   | ID2         | Gene            |
| Hs.PT.58.28216021.g | ID3         | Gene            |
| Hs.PT.58.3325181    | IDH2        | Gene            |
| Hs.PT.58.21022358   | IGF1        | Gene            |
| Hs.PT.58.3124838    | IGF1R       | Gene            |
| Hs.PT.58.39913403   | IGF2        | Gene            |
| Hs.PT.58.2960172    | IKZF2       | Gene            |
| Hs.PT.58.40248696   | IKZF4       | Gene            |
| Hs.PT.58.2807216    | IL10        | Gene            |
| Hs.PT.58.24748926.g | IL11        | Gene            |

| <b>Assay ID</b>     | <b>Gene</b> | <b>Category</b> |
|---------------------|-------------|-----------------|
| Hs.PT.58.2925830    | IL12B       | Gene            |
| Hs.PT.58.40619905.g | IL13        | Gene            |
| Hs.PT.58.40913627   | IL1A        | Gene            |
| Hs.PT.58.40418102   | IL1RL1      | Gene            |
| Hs.PT.58.1142676    | IL2         | Gene            |
| Hs.PT.58.40988560   | IL20        | Gene            |
| Hs.PT.58.39225615   | IL25        | Gene            |
| Hs.PT.58.27391604.g | IL3         | Gene            |
| Hs.PT.58.4234786    | IL31RA      | Gene            |
| Hs.PT.58.40566580.g | IL34        | Gene            |
| Hs.PT.58.3677789    | IL3RA       | Gene            |
| Hs.PT.58.46539563.g | IL4         | Gene            |
| Hs.PT.58.40226675   | IL6         | Gene            |
| Hs.PT.58.3039085    | IL6R        | Gene            |
| Hs.PT.58.25392734   | IL6ST       | Gene            |
| Hs.PT.58.41040415   | INHA        | Gene            |
| Hs.PT.58.45759784   | INHBA       | Gene            |
| Hs.PT.58.20779161   | IPCEF1      | Gene            |
| Hs.PT.58.1466002    | IRX5        | Gene            |
| Hs.PT.58.2143768    | ISL1        | Gene            |
| Hs.PT.58.48619894   | ITGA2       | Gene            |
| Hs.PT.58.4432462    | ITGA2B      | Gene            |
| Hs.PT.58.21197358   | ITGA3       | Gene            |
| Hs.PT.58.40415661   | ITGA4       | Gene            |
| Hs.PT.58.4796384    | ITGA5       | Gene            |
| Hs.PT.58.3269996    | ITGA6       | Gene            |
| Hs.PT.58.2067349    | ITGA7       | Gene            |
| Hs.PT.58.20217362   | ITGAE       | Gene            |
| Hs.PT.58.40141028   | ITGAM       | Gene            |
| Hs.PT.58.39883300   | ITGB1       | Gene            |
| Hs.PT.58.24825754   | ITGB3       | Gene            |
| Hs.PT.58.3041082.g  | ITGB7       | Gene            |
| Hs.PT.56a.4972610   | JAG1        | Gene            |
| Hs.PT.58.3493191    | JAG2        | Gene            |
| Hs.PT.58.25272310   | JAK2        | Gene            |

| <b>Assay ID</b>     | <b>Gene</b> | <b>Category</b> |
|---------------------|-------------|-----------------|
| Hs.PT.58.25094714.g | JUN         | Gene            |
| Hs.PT.58.27174746.g | JUNB        | Gene            |
| Hs.PT.58.38808279   | KCNJ13      | Gene            |
| Hs.PT.58.25641743   | KDM1A       | Gene            |
| Hs.PT.58.26856020.g | KDM3A       | Gene            |
| Hs.PT.58.3285240    | KDR         | Gene            |
| Hs.PT.58.2286022    | KIT         | Gene            |
| Hs.PT.58.19344031   | KITLG       | Gene            |
| Hs.PT.58.14388168   | KLF1        | Gene            |
| Hs.PT.58.28103949   | KLF12       | Gene            |
| Hs.PT.56a.40282397  | KLF5        | Gene            |
| Hs.PT.58.24464020   | KLHL13      | Gene            |
| Hs.PT.58.39000128   | KPNA2       | Gene            |
| Hs.PT.58.25453077   | KPNB1       | Gene            |
| Hs.PT.58.836388     | LAMA3       | Gene            |
| Hs.PT.58.485884.g   | LAMP1       | Gene            |
| Hs.PT.58.27830864   | LAMP2       | Gene            |
| Hs.PT.58.19369169   | LAMP3       | Gene            |
| Hs.PT.58.2865752    | LAMTOR5     | Gene            |
| Hs.PT.58.40245343   | LDHA        | Gene            |
| Hs.PT.58.38416124   | LDHB        | Gene            |
| Hs.PT.58.14508350   | LEF1        | Gene            |
| Hs.PT.58.39290199   | LHX6        | Gene            |
| Hs.PT.58.2876127.g  | LIF         | Gene            |
| Hs.PT.58.2980475    | LIFR        | Gene            |
| Hs.PT.58.15225811   | LIG1        | Gene            |
| Hs.PT.58.26266443   | LIG4        | Gene            |
| Hs.PT.58.2411274    | LIMK2       | Gene            |
| Hs.PT.58.24268123   | LIN28A      | Gene            |
| Hs.PT.58.27100749   | LMO2        | Gene            |
| Hs.PT.58.1471308    | LOX         | Gene            |
| Hs.PT.58.25540191   | LRMP        | Gene            |
| Hs.PT.58.38528896   | LSP1        | Gene            |
| Hs.PT.58.20111501   | LTF         | Gene            |
| Hs.PT.58.4255665    | LUC7L3      | Gene            |



| <b>Assay ID</b>      | <b>Gene</b> | <b>Category</b> |
|----------------------|-------------|-----------------|
| Hs.PT.58.25674878.gs | LYL1        | Gene            |
| Hs.PT.58.3438819     | LYST        | Gene            |
| Hs.PT.58.26912784.g  | MAL         | Gene            |
| Hs.PT.58.38445928    | MAML3       | Gene            |
| Hs.PT.58.19983600    | MAP2K1      | Gene            |
| Hs.PT.58.3250219     | MAP2K5      | Gene            |
| Hs.PT.58.24916350    | MAP3K7      | Gene            |
| Hs.PT.58.1467068     | MAP4K1      | Gene            |
| Hs.PT.58.19211033    | MAP4K3      | Gene            |
| Hs.PT.58.18751097    | MAP4K4      | Gene            |
| Hs.PT.58.2751839     | MAP4K5      | Gene            |
| Hs.PT.58.39782850    | MAPK1       | Gene            |
| Hs.PT.58.25470360    | MAPK10      | Gene            |
| Hs.PT.58.38819788    | MAPK8       | Gene            |
| Hs.PT.58.23049618    | MAPK9       | Gene            |
| Hs.PT.58.841956      | MASTL       | Gene            |
| Hs.PT.58.28321385    | MBNL1       | Gene            |
| Hs.PT.58.19109612    | MBP         | Gene            |
| Hs.PT.58.1431437     | MCL1        | Gene            |
| Hs.PT.58.46520749    | MCM2        | Gene            |
| Hs.PT.58.1334606     | MCM3        | Gene            |
| Hs.PT.58.3215896     | MCM4        | Gene            |
| Hs.PT.58.45326936    | MCM5        | Gene            |
| Hs.PT.58.38680806    | MDC1        | Gene            |
| Hs.PT.58.38439932    | MDH2        | Gene            |
| Hs.PT.58.40831613    | MEIS1       | Gene            |
| Hs.PT.58.4390670     | MEIS2       | Gene            |
| Hs.PT.58.47792779    | MGST1       | Gene            |
| Hs.PT.58.2859929     | MITF        | Gene            |
| Hs.PT.58.4553924     | MIXL1       | Gene            |
| Hs.PT.58.22814824.g  | MMP9        | Gene            |
| Hs.PT.58.4579399     | MNAT1       | Gene            |
| Hs.PT.58.680865      | MPL         | Gene            |
| Hs.PT.58.3471204     | MPO         | Gene            |
| Hs.PT.58.40957279    | MPV17L      | Gene            |

| <b>Assay ID</b>    | <b>Gene</b> | <b>Category</b> |
|--------------------|-------------|-----------------|
| Hs.PT.58.27516763  | MRE11A      | Gene            |
| Hs.PT.58.4331480   | MSI2        | Gene            |
| Hs.PT.58.38848034  | MSRA        | Gene            |
| Hs.PT.58.2525709   | MSX1        | Gene            |
| Hs.PT.58.1855833.g | MUS81       | Gene            |
| Hs.PT.58.264008    | MYB         | Gene            |
| Hs.PT.58.2258860   | MYH10       | Gene            |
| Hs.PT.58.1760411   | MYT1        | Gene            |
| Hs.PT.58.3438478   | NBN         | Gene            |
| Hs.PT.58.3970990   | NCAM1       | Gene            |
| Hs.PT.58.39990207  | NCDN        | Gene            |
| Hs.PT.58.19204009  | NCOA6       | Gene            |
| Hs.PT.58.38493496  | NDE1        | Gene            |
| Hs.PT.58.39625432  | NDRG2       | Gene            |
| Hs.PT.58.45285779  | NDUFA6      | Gene            |
| Hs.PT.58.21219212  | NDUFB4      | Gene            |
| Hs.PT.58.20037448  | NDUFS2      | Gene            |
| Hs.PT.58.22428357  | NEK6        | Gene            |
| Hs.PT.58.1801373   | NFATC2      | Gene            |
| Hs.PT.58.3356525   | NFIB        | Gene            |
| Hs.PT.58.24326460  | NHEJ1       | Gene            |
| Hs.PT.58.21333168  | NHLH2       | Gene            |
| Hs.PT.58.2461055   | NKX2-1      | Gene            |
| Hs.PT.58.27653648  | NLK         | Gene            |
| Hs.PT.58.14740388  | NOS2        | Gene            |
| Hs.PT.58.21447620  | NOS3        | Gene            |
| Hs.PT.58.23074795  | NOTCH1      | Gene            |
| Hs.PT.58.28296019  | NOTCH2      | Gene            |
| Hs.PT.58.15643624  | NOTCH4      | Gene            |
| Hs.PT.58.24300829  | NOX1        | Gene            |
| Hs.PT.58.3065606   | NOX3        | Gene            |
| Hs.PT.58.3866448   | NOX4        | Gene            |
| Hs.PT.58.40924963  | NOX5        | Gene            |
| Hs.PT.58.40019160  | NPM1        | Gene            |
| Hs.PT.58.2697277   | NQO1        | Gene            |

| <b>Assay ID</b>     | <b>Gene</b> | <b>Category</b> |
|---------------------|-------------|-----------------|
| Hs.PT.58.39997829   | NR4A1       | Gene            |
| Hs.PT.58.45649534   | NR5A2       | Gene            |
| Hs.PT.58.1271059    | NRAS        | Gene            |
| Hs.PT.58.25974148   | NRP2        | Gene            |
| Hs.PT.58.24249783   | NTF4        | Gene            |
| Hs.PT.58.22560376   | NUFIP2      | Gene            |
| Hs.PT.58.2015234    | NUMA1       | Gene            |
| Hs.PT.58.4879244    | NUMB        | Gene            |
| Hs.PT.58.21180980   | OGDH        | Gene            |
| Hs.PT.58.40048647.g | OPRM1       | Gene            |
| Hs.PT.58.40233450   | ORC6        | Gene            |
| Hs.PT.58.45339180.g | OSM         | Gene            |
| Hs.PT.58.4051301    | OSMR        | Gene            |
| Hs.PT.58.40853724   | PAX2        | Gene            |
| Hs.PT.58.3860000    | PAX5        | Gene            |
| Hs.PT.58.3002797    | PAX6        | Gene            |
| Hs.PT.58.1092254.g  | PCBP4       | Gene            |
| Hs.PT.58.2786874    | PCF11       | Gene            |
| Hs.PT.58.4761611    | PCNA        | Gene            |
| Hs.PT.58.45699973   | PDGFRA      | Gene            |
| Hs.PT.58.38803425   | PDHA1       | Gene            |
| Hs.PT.58.20876171.g | PDHA2       | Gene            |
| Hs.PT.58.3078365    | PDK1        | Gene            |
| Hs.PT.58.40244117   | PDK2        | Gene            |
| Hs.PT.58.26590302   | PDK3        | Gene            |
| Hs.PT.58.3853626    | PDK4        | Gene            |
| Hs.PT.58.46258994   | PDLIM1      | Gene            |
| Hs.PT.58.25524614   | PDP1        | Gene            |
| Hs.PT.58.19487865   | PECAM1      | Gene            |
| Hs.PT.58.21005747   | PELI2       | Gene            |
| Hs.PT.58.1669823.g  | PF4         | Gene            |
| Hs.PT.58.19576058   | PFKL        | Gene            |
| Hs.PT.58.3721       | PFKM        | Gene            |
| Hs.PT.58.19310435   | PFKP        | Gene            |
| Hs.PT.58.39519187   | PGK1        | Gene            |

| <b>Assay ID</b>      | <b>Gene</b> | <b>Category</b> |
|----------------------|-------------|-----------------|
| Hs.PT.58.40221999    | PGLS        | Gene            |
| Hs.PT.58.20312844    | PHOX2B      | Gene            |
| Hs.PT.58.866326      | PIK3CG      | Gene            |
| Hs.PT.58.5066731     | PIK3R3      | Gene            |
| Hs.PT.58.26602866    | PILRB       | Gene            |
| Hs.PT.58.28069894    | PIM1        | Gene            |
| Hs.PT.58.25188219    | PIM2        | Gene            |
| Hs.PT.58.3348936.g   | PITX2       | Gene            |
| Hs.PT.58.19776078    | PLAU        | Gene            |
| Hs.PT.58.39400754    | PLEKHG6     | Gene            |
| Hs.PT.58.15700476    | PMS2P5      | Gene            |
| Hs.PT.58.3062801.gs  | PNKP        | Gene            |
| Hs.PT.58.2658525     | PNLIPRP1    | Gene            |
| Hs.PT.58.25853311.g  | PNMT        | Gene            |
| Hs.PT.58.39577992    | POLD1       | Gene            |
| Hs.PT.58.1666726.g   | POLD2       | Gene            |
| Hs.PT.58.445085      | POLD3       | Gene            |
| Hs.PT.58.40841836.g  | POLD4       | Gene            |
| Hs.PT.58.20862405    | POLL        | Gene            |
| Hs.PT.58.1537882     | PPARG       | Gene            |
| Hs.PT.58.40982761    | PPARGC1A    | Gene            |
| Hs.PT.58.25162945    | PPP2R4      | Gene            |
| Hs.PT.56a.28044743.g | PRDM1       | Gene            |
| Hs.PT.58.934660      | PRDX1       | Gene            |
| Hs.PT.58.4014425.g   | PRDX2       | Gene            |
| Hs.PT.58.2010183     | PRDX4       | Gene            |
| Hs.PT.58.338345      | PRDX6       | Gene            |
| Hs.PT.58.39885312    | PRELID1     | Gene            |
| Hs.PT.58.14488451    | PRKCZ       | Gene            |
| Hs.PT.58.345178      | PRKDC       | Gene            |
| Hs.PT.58.631602.g    | PRNP        | Gene            |
| Hs.PT.58.19279474    | PRPS1       | Gene            |
| Hs.PT.58.45647828    | PRPS2       | Gene            |
| Hs.PT.58.39830063    | PTCH1       | Gene            |
| Hs.PT.58.39503117    | PTPN11      | Gene            |

| <b>Assay ID</b>      | <b>Gene</b> | <b>Category</b> |
|----------------------|-------------|-----------------|
| Hs.PT.58.14728917    | PTPN6       | Gene            |
| Hs.PT.58.2558434     | PTPRC       | Gene            |
| Hs.PT.58.24716816    | PVRL2       | Gene            |
| Hs.PT.58.40675601.g  | RAB24       | Gene            |
| Hs.PT.58.4406680     | RAB3C       | Gene            |
| Hs.PT.58.3272434     | RAC1        | Gene            |
| Hs.PT.58.14823504    | RAD50       | Gene            |
| Hs.PT.58.760602      | RAD51       | Gene            |
| Hs.PT.58.22646548    | RAD51B      | Gene            |
| Hs.PT.58.40784886    | RAD51C      | Gene            |
| Hs.PT.58.2390379     | RAD52       | Gene            |
| Hs.PT.58.27658229    | RAD54B      | Gene            |
| Hs.PT.58.38442141    | RAD54L      | Gene            |
| Hs.PT.58.25805985    | RAP1B       | Gene            |
| Hs.PT.58.364456      | RARB        | Gene            |
| Hs.PT.58.217934      | RBFOX1      | Gene            |
| Hs.PT.58.4105281     | RBPJ        | Gene            |
| Hs.PT.58.28132326    | RPMS        | Gene            |
| Hs.PT.58.40644908    | RGN         | Gene            |
| Hs.PT.58.39721574    | RGS18       | Gene            |
| Hs.PT.56a.40646229.g | RHOB        | Gene            |
| Hs.PT.58.2620402     | RLIM        | Gene            |
| Hs.PT.58.39473758    | ROCK1       | Gene            |
| Hs.PT.58.19695948    | RORA        | Gene            |
| Hs.PT.58.19417075    | RORC        | Gene            |
| Hs.PT.58.20851063    | RPA1        | Gene            |
| Hs.PT.58.38762774    | RPA2        | Gene            |
| Hs.PT.58.25693101    | RPA3        | Gene            |
| Hs.PT.58.25856860.g  | RPA4        | Gene            |
| Hs.PT.58.20130770    | RPE         | Gene            |
| Hs.PT.58.2025564     | RUNX1       | Gene            |
| Hs.PT.56a.20806745   | RUNX1T1     | Gene            |
| Hs.PT.58.26392294.g  | S1PR2       | Gene            |
| Hs.PT.58.14833003    | SBNO2       | Gene            |
| Hs.PT.58.40105692    | SCAF4       | Gene            |

| <b>Assay ID</b>     | <b>Gene</b> | <b>Category</b> |
|---------------------|-------------|-----------------|
| Hs.PT.58.3383192    | SCUBE3      | Gene            |
| Hs.PT.58.40170798   | SDHA        | Gene            |
| Hs.PT.58.26657766   | SDPR        | Gene            |
| Hs.PT.58.15432551   | SELE        | Gene            |
| Hs.PT.58.41023815   | SELP        | Gene            |
| Hs.PT.58.2858430    | SERTAD1     | Gene            |
| Hs.PT.58.3098270    | SFXN1       | Gene            |
| Hs.PT.58.41102411   | SGIP1       | Gene            |
| Hs.PT.58.2452854.g  | SH2B3       | Gene            |
| Hs.PT.58.1201262    | SH2D2A      | Gene            |
| Hs.PT.58.38373450   | SHFM1       | Gene            |
| Hs.PT.58.24836645   | SHOX2       | Gene            |
| Hs.PT.58.27183318   | SIRPA       | Gene            |
| Hs.PT.58.40382601   | SIRT1       | Gene            |
| Hs.PT.58.20841096   | SIX1        | Gene            |
| Hs.PT.58.2548756    | SKI         | Gene            |
| Hs.PT.58.20087387   | SKP2        | Gene            |
| Hs.PT.58.24703737   | SLAMF1      | Gene            |
| Hs.PT.58.2038710    | SLC14A1     | Gene            |
| Hs.PT.58.27954411   | SLC18A2     | Gene            |
| Hs.PT.58.39625040   | SLC26A7     | Gene            |
| Hs.PT.58.19483617   | SLC26A9     | Gene            |
| Hs.PT.58.39033300   | SLC2A3      | Gene            |
| Hs.PT.58.3936826    | SLC35A2     | Gene            |
| Hs.PT.58.19925047   | SLC4A1      | Gene            |
| Hs.PT.58.39956647   | SLC8A3      | Gene            |
| Hs.PT.58.20755025   | SMAD1       | Gene            |
| Hs.PT.58.1353084    | SMAD2       | Gene            |
| Hs.PT.58.1647675    | SMAD3       | Gene            |
| Hs.PT.58.472774     | SMAD4       | Gene            |
| Hs.PT.58.1034954    | SMAD5       | Gene            |
| Hs.PT.58.27645265.g | SMAD6       | Gene            |
| Hs.PT.58.39918935   | SMAD7       | Gene            |
| Hs.PT.58.18749479   | SMAD9       | Gene            |
| Hs.PT.58.4506296    | SMC1A       | Gene            |

| <b>Assay ID</b>     | <b>Gene</b> | <b>Category</b> |
|---------------------|-------------|-----------------|
| Hs.PT.58.39588622   | SMURF1      | Gene            |
| Hs.PT.58.20046277   | SMURF2      | Gene            |
| Hs.PT.58.39107291.g | SOCS1       | Gene            |
| Hs.PT.58.40736839.g | SOCS2       | Gene            |
| Hs.PT.58.4303529    | SOCS3       | Gene            |
| Hs.PT.58.20317581   | SOCS5       | Gene            |
| Hs.PT.58.40749733   | SOD1        | Gene            |
| Hs.PT.58.39970926   | SOD2        | Gene            |
| Hs.PT.58.26108454   | SOD3        | Gene            |
| Hs.PT.58.24974948.g | SOX4        | Gene            |
| Hs.PT.58.22512256   | SOX5        | Gene            |
| Hs.PT.58.20462363   | SPARC       | Gene            |
| Hs.PT.58.19735554   | SPI1        | Gene            |
| Hs.PT.58.4484994    | SPN         | Gene            |
| Hs.PT.58.19252426   | SPP1        | Gene            |
| Hs.PT.58.3797199    | SPRY4       | Gene            |
| Hs.PT.58.1832763    | SPTA1       | Gene            |
| Hs.PT.58.14624331   | SPTB        | Gene            |
| Hs.PT.58.19132577   | SRC         | Gene            |
| Hs.PT.58.3805045    | SRD5A3      | Gene            |
| Hs.PT.58.26032445.g | SRSF2       | Gene            |
| Hs.PT.58.21256932   | SRXN1       | Gene            |
| Hs.PT.58.2978358    | SSBP1       | Gene            |
| Hs.PT.58.1013377    | STAG3L4     | Gene            |
| Hs.PT.58.15049687   | STAT1       | Gene            |
| Hs.PT.58.14993255   | STAT2       | Gene            |
| Hs.PT.58.20367494   | STAT3       | Gene            |
| Hs.PT.58.40907389   | STAT4       | Gene            |
| Hs.PT.58.19585248   | STAT5A      | Gene            |
| Hs.PT.58.1687221    | STAT5B      | Gene            |
| Hs.PT.58.19698584   | STAT6       | Gene            |
| Hs.PT.58.38362090   | STC2        | Gene            |
| Hs.PT.58.2768311    | STIM2       | Gene            |
| Hs.PT.58.1713067    | STK25       | Gene            |
| Hs.PT.58.20193035   | SUCLA2      | Gene            |

| <b>Assay ID</b>     | <b>Gene</b> | <b>Category</b> |
|---------------------|-------------|-----------------|
| Hs.PT.58.26957310   | SUMO1       | Gene            |
| Hs.PT.58.724371     | SUSD1       | Gene            |
| Hs.PT.58.1243965    | T           | Gene            |
| Hs.PT.58.4566327    | TAB2        | Gene            |
| Hs.PT.58.40002134   | TACC1       | Gene            |
| Hs.PT.58.975520     | TAL1        | Gene            |
| Hs.PT.58.19158678   | TBX5        | Gene            |
| Hs.PT.58.39386325   | TCF12       | Gene            |
| Hs.PT.58.15365095   | TCF7L2      | Gene            |
| Hs.PT.58.19878762   | TEK         | Gene            |
| Hs.PT.58.27489922   | TERT        | Gene            |
| Hs.PT.58.26872107   | TFEC        | Gene            |
| Hs.PT.39a.22214826  | TFRC        | Gene            |
| Hs.PT.58.22256055   | TGFA        | Gene            |
| Hs.PT.58.39813975   | TGFB1       | Gene            |
| Hs.PT.58.24824921   | TGFB2       | Gene            |
| Hs.PT.58.27186053   | TGFB3       | Gene            |
| Hs.PT.58.40018323   | TGFBI       | Gene            |
| Hs.PT.58.39655969   | TGFBR1      | Gene            |
| Hs.PT.58.3666465    | TGFBR2      | Gene            |
| Hs.PT.58.19437010   | THBS1       | Gene            |
| Hs.PT.58.23012211   | THBS2       | Gene            |
| Hs.PT.58.27473801   | THBS3       | Gene            |
| Hs.PT.58.21186063   | THPO        | Gene            |
| Hs.PT.58.22816234   | THY1        | Gene            |
| Hs.PT.58.470742     | TIE1        | Gene            |
| Hs.PT.58.27632928   | TIMP1       | Gene            |
| Hs.PT.58.14780594   | TIMP2       | Gene            |
| Hs.PT.58.1756331    | TIMP3       | Gene            |
| Hs.PT.58.21157455   | TLN1        | Gene            |
| Hs.PT.58.25887499.g | TLR3        | Gene            |
| Hs.PT.58.38700156.g | TLR4        | Gene            |
| Hs.PT.58.1033703.g  | TLX2        | Gene            |
| Hs.PT.58.40625927   | TMEM180     | Gene            |
| Hs.PT.58.1802373    | TMOD1       | Gene            |



| <b>Assay ID</b>      | <b>Gene</b> | <b>Category</b> |
|----------------------|-------------|-----------------|
| Hs.PT.58.2529606     | TNC         | Gene            |
| Hs.PT.58.45380900    | TNF         | Gene            |
| Hs.PT.58.23324760    | TNFSF11     | Gene            |
| Hs.PT.58.24935443    | TNFSF13B    | Gene            |
| Hs.PT.58.909199.g    | TOB1        | Gene            |
| Hs.PT.58.14759392    | TP53BP1     | Gene            |
| Hs.PT.58.39860045.g  | TPI1        | Gene            |
| Hs.PT.58.39623417.g  | TPM3        | Gene            |
| Hs.PT.58.19675433    | TRAP1       | Gene            |
| Hs.PT.58.2459355     | TRIM10      | Gene            |
| Hs.PT.58.4331913     | TSC22D3     | Gene            |
| Hs.PT.56a.213661     | TSPO        | Gene            |
| Hs.PT.58.23073507    | TUBB2A      | Gene            |
| Hs.PT.58.4545459.g   | TUBB2B      | Gene            |
| Hs.PT.58.18940950    | TWIST1      | Gene            |
| Hs.PT.58.24523241    | TXN         | Gene            |
| Hs.PT.58.1833731     | TXNRD1      | Gene            |
| Hs.PT.58.45333153    | TXNRD2      | Gene            |
| Hs.PT.58.24610034    | UBE2B       | Gene            |
| Hs.PT.58.19793396    | VASN        | Gene            |
| Hs.PT.58.2346899     | VAV1        | Gene            |
| Hs.PT.58.20405152    | VCAM1       | Gene            |
| Hs.PT.58.21234833    | VEGFA       | Gene            |
| Hs.PT.58.38906895    | VIM         | Gene            |
| Hs.PT.58.39841194    | VIMP        | Gene            |
| Hs.PT.58.2333912     | VIP         | Gene            |
| Hs.PT.58.20957862.g  | VNN1        | Gene            |
| Hs.PT.58.40010464    | VNN2        | Gene            |
| Hs.PT.58.22759920.gs | VPS18       | Gene            |
| Hs.PT.58.20024588    | VRK1        | Gene            |
| Hs.PT.58.1205436.g   | VTN         | Gene            |
| Hs.PT.58.26129052    | VWF         | Gene            |
| Hs.PT.58.3493460     | WBP4        | Gene            |
| Hs.PT.58.3793365     | WDR81       | Gene            |
| Hs.PT.58.1228219     | WHSC1L1     | Gene            |

| <b>Assay ID</b>     | <b>Gene</b> | <b>Category</b> |
|---------------------|-------------|-----------------|
| Hs.PT.58.40456425.g | WNT1        | Gene            |
| Hs.PT.58.39365041   | WNT10A      | Gene            |
| Hs.PT.58.4920373    | WNT10B      | Gene            |
| Hs.PT.58.40563072   | WNT11       | Gene            |
| Hs.PT.58.39952122   | WNT16       | Gene            |
| Hs.PT.58.24288141   | WNT2        | Gene            |
| Hs.PT.58.26560263   | WNT2B       | Gene            |
| Hs.PT.58.15704138   | WNT3A       | Gene            |
| Hs.PT.58.40715343   | WNT4        | Gene            |
| Hs.PT.58.22221435   | WNT5A       | Gene            |
| Hs.PT.58.3887638    | WNT5B       | Gene            |
| Hs.PT.58.2248213    | WNT6        | Gene            |
| Hs.PT.58.39975999   | WNT7A       | Gene            |
| Hs.PT.58.125053     | WNT7B       | Gene            |
| Hs.PT.58.875247     | WNT8A       | Gene            |
| Hs.PT.58.25267674   | WNT8B       | Gene            |
| Hs.PT.58.39050185   | WNT9A       | Gene            |
| Hs.PT.58.40365348   | WNT9B       | Gene            |
| Hs.PT.58.24479475   | XRCC2       | Gene            |
| Hs.PT.58.2971406    | XRCC3       | Gene            |
| Hs.PT.58.38914432   | XRCC4       | Gene            |
| Hs.PT.58.4426374    | XRCC5       | Gene            |
| Hs.PT.58.26803952   | XRCC6       | Gene            |
| Hs.PT.58.28058968   | YES1        | Gene            |
| Hs.PT.58.2308127.g  | ZC3H12A     | Gene            |
| Hs.PT.58.2422798    | ZFPM1       | Gene            |
| Hs.PT.58.20511748   | ZMYND8      | Gene            |
| Hs.PT.58.1255829    | ZW10        | Gene            |

**Supplemental Table 1. Gene lists included in the multiplex RT-PCR analysis.**

ACTB, B2M, GUSB, HMBS, HPRT1, RNA18S5, RPLP0 and TBP were used as the multiple control genes.

**Supplemental Table 2. Values of gene expressions normalized by the multiple control genes.**

| <b>Gene</b> | <b>Category &amp; Cluster</b> | <b>Origin</b> |
|-------------|-------------------------------|---------------|
| A2M         | CD41+, Cluster A              | GeneMANIA     |
| ACVRL1      | CD41+, Cluster A              | Array         |
| ADAMTSL1    | CD41+, Cluster A              | Array         |
| AGP2        | CD41+, Cluster A              | Array         |
| AMHR2       | CD41+, Cluster A              | Array         |
| ATP2B4      | CD41+, Cluster A              | Array         |
| BDNF        | CD41+, Cluster A              | GeneMANIA     |
| BMP2        | CD41+, Cluster A              | GeneMANIA     |
| CALD1       | CD41+, Cluster A              | Array         |
| CAV1        | CD41+, Cluster A              | Array         |
| CD9         | CD41+, Cluster A              | Array         |
| CHD2        | CD41+, Cluster A              | Array         |
| CHST15      | CD41+, Cluster A              | Array         |
| CSF1        | CD41+, Cluster A              | Array         |
| CTHRC1      | CD41+, Cluster A              | Array         |
| DLL1        | CD41+, Cluster A              | Array         |
| DMD         | CD41+, Cluster A              | Array         |
| EN1         | CD41+, Cluster A              | Array         |
| EPAS1       | CD41+, Cluster A              | Array         |
| ERG         | CD41+, Cluster A              | Array         |
| F2R         | CD41+, Cluster A              | GeneMANIA     |
| FHL1        | CD41+, Cluster A              | Array         |
| FLT1        | CD41+, Cluster A              | Array         |
| FN1         | CD41+, Cluster A              | Array         |
| FOXA1       | CD41+, Cluster A              | Array         |
| GATA6       | CD41+, Cluster A              | Array         |
| GPX1        | CD41+, Cluster A              | Array         |
| GPX3        | CD41+, Cluster A              | Array         |
| HIF1A       | CD41+, Cluster A              | Array         |
| ID3         | CD41+, Cluster A              | GeneMANIA     |
| IGF2        | CD41+, Cluster A              | Array         |
| IL1RL1      | CD41+, Cluster A              | Array         |
| ISL1        | CD41+, Cluster A              | Array         |

| <b>Gene</b> | <b>Category &amp; Cluster</b> | <b>Origin</b> |
|-------------|-------------------------------|---------------|
| ITGA3       | CD41+, Cluster A              | Array         |
| ITGA6       | CD41+, Cluster A              | Array         |
| ITGA7       | CD41+, Cluster A              | Array         |
| ITGAV       | CD41+, Cluster A              | GeneMANIA     |
| ITGB3       | CD41+, Cluster A              | Array         |
| KDR         | CD41+, Cluster A              | Array         |
| KLHL13      | CD41+, Cluster A              | Array         |
| LAMB1       | CD41+, Cluster A              | GeneMANIA     |
| LHX6        | CD41+, Cluster A              | Array         |
| LIFR        | CD41+, Cluster A              | Array         |
| LOX         | CD41+, Cluster A              | Array         |
| MEIS1       | CD41+, Cluster A              | Array         |
| MSX1        | CD41+, Cluster A              | Array         |
| NFIB        | CD41+, Cluster A              | Array         |
| NRCAM       | CD41+, Cluster A              | GeneMANIA     |
| NTF4        | CD41+, Cluster A              | Array         |
| NTRK2       | CD41+, Cluster A              | GeneMANIA     |
| OSMR        | CD41+, Cluster A              | Array         |
| PDGFRA      | CD41+, Cluster A              | Array         |
| PDLIM1      | CD41+, Cluster A              | Array         |
| PITX2       | CD41+, Cluster A              | Array         |
| PTCH1       | CD41+, Cluster A              | Array         |
| RGN         | CD41+, Cluster A              | Array         |
| RHOB        | CD41+, Cluster A              | Array         |
| SDPR        | CD41+, Cluster A              | Array         |
| SELP        | CD41+, Cluster A              | Array         |
| SLC18A2     | CD41+, Cluster A              | Array         |
| SMAD7       | CD41+, Cluster A              | GeneMANIA     |
| SOD3        | CD41+, Cluster A              | Array         |
| SOX5        | CD41+, Cluster A              | Array         |
| SPARC       | CD41+, Cluster A              | Array         |
| TF          | CD41+, Cluster A              | GeneMANIA     |
| TGFB2       | CD41+, Cluster A              | Array         |

| <b>Gene</b> | <b>Category &amp; Cluster</b> | <b>Origin</b> |
|-------------|-------------------------------|---------------|
| TGFB3       | CD41+, Cluster A              | Array         |
| TGFBI       | CD41+, Cluster A              | Array         |
| TGFBR2      | CD41+, Cluster A              | Array         |
| TGFBR3      | CD41+, Cluster A              | GeneMANIA     |
| THBS1       | CD41+, Cluster A              | Array         |
| THY1        | CD41+, Cluster A              | Array         |
| TIMP2       | CD41+, Cluster A              | Array         |
| TLR4        | CD41+, Cluster A              | Array         |
| TNC         | CD41+, Cluster A              | Array         |
| TWIST1      | CD41+, Cluster A              | Array         |
| VASN        | CD41+, Cluster A              | Array         |
| VEGFC       | CD41+, Cluster A              | GeneMANIA     |
| VPS18       | CD41+, Cluster A              | Array         |
| VTN         | CD41+, Cluster A              | Array         |
| WNT2        | CD41+, Cluster A              | Array         |
| ANAPC4      | CD41+, Cluster B              | Array         |
| ASH2L       | CD41+, Cluster B              | Array         |
| ASXL1       | CD41+, Cluster B              | Array         |
| ATF4        | CD41+, Cluster B              | Array         |
| BIRC5       | CD41+, Cluster B              | Array         |
| BRIP1       | CD41+, Cluster B              | Array         |
| CD164       | CD41+, Cluster B              | Array         |
| CDK7        | CD41+, Cluster B              | Array         |
| CEP57       | CD41+, Cluster B              | Array         |
| CSNK1A1     | CD41+, Cluster B              | Array         |
| CSNK2A1     | CD41+, Cluster B              | Array         |
| CTCF        | CD41+, Cluster B              | Array         |
| DENND1B     | CD41+, Cluster B              | Array         |
| DLAT        | CD41+, Cluster B              | GeneMANIA     |
| DLD         | CD41+, Cluster B              | Array         |
| ENO2        | CD41+, Cluster B              | Array         |
| GAPDH       | CD41+, Cluster B              | Array         |
| GLA         | CD41+, Cluster B              | Array         |

| <b>Gene</b> | <b>Category &amp; Cluster</b> | <b>Origin</b> |
|-------------|-------------------------------|---------------|
| GLRX        | CD41+, Cluster B              | Array         |
| GLRX2       | CD41+, Cluster B              | Array         |
| GSR         | CD41+, Cluster B              | Array         |
| HMOX2       | CD41+, Cluster B              | Array         |
| LAMTOR5     | CD41+, Cluster B              | Array         |
| LDHA        | CD41+, Cluster B              | GeneMANIA     |
| LDHB        | CD41+, Cluster B              | Array         |
| MAP2K1      | CD41+, Cluster B              | Array         |
| MAP3K7      | CD41+, Cluster B              | Array         |
| MAPK9       | CD41+, Cluster B              | Array         |
| MBNL1       | CD41+, Cluster B              | Array         |
| MDH2        | CD41+, Cluster B              | Array         |
| MPV17L      | CD41+, Cluster B              | Array         |
| MSI2        | CD41+, Cluster B              | Array         |
| NBN         | CD41+, Cluster B              | Array         |
| NQO1        | CD41+, Cluster B              | Array         |
| NUFIP2      | CD41+, Cluster B              | Array         |
| ODC1        | CD41+, Cluster B              | GeneMANIA     |
| PCNA        | CD41+, Cluster B              | Array         |
| PDHA1       | CD41+, Cluster B              | GeneMANIA     |
| PDHA2       | CD41+, Cluster B              | Array         |
| PDHB        | CD41+, Cluster B              | GeneMANIA     |
| PDK3        | CD41+, Cluster B              | Array         |
| PDP1        | CD41+, Cluster B              | Array         |
| PGK1        | CD41+, Cluster B              | Array         |
| PRDX1       | CD41+, Cluster B              | GeneMANIA     |
| PRDX2       | CD41+, Cluster B              | Array         |
| PRDX4       | CD41+, Cluster B              | Array         |
| PRDX6       | CD41+, Cluster B              | Array         |
| PRPS1       | CD41+, Cluster B              | Array         |
| PRPS2       | CD41+, Cluster B              | Array         |
| RAP1B       | CD41+, Cluster B              | Array         |
| RPA3        | CD41+, Cluster B              | Array         |



| <b>Gene</b> | <b>Category &amp; Cluster</b> | <b>Origin</b> |
|-------------|-------------------------------|---------------|
| RRM1        | CD41+, Cluster B              | GeneMANIA     |
| RRM2        | CD41+, Cluster B              | GeneMANIA     |
| SCAF4       | CD41+, Cluster B              | Array         |
| SDHA        | CD41+, Cluster B              | Array         |
| SDHB        | CD41+, Cluster B              | GeneMANIA     |
| SHFM1       | CD41+, Cluster B              | Array         |
| SMURF1      | CD41+, Cluster B              | Array         |
| SRXN1       | CD41+, Cluster B              | Array         |
| SUCLA2      | CD41+, Cluster B              | Array         |
| SUCLG1      | CD41+, Cluster B              | GeneMANIA     |
| TAB2        | CD41+, Cluster B              | Array         |
| TGFBR1      | CD41+, Cluster B              | Array         |
| TRAP1       | CD41+, Cluster B              | Array         |
| TXN         | CD41+, Cluster B              | GeneMANIA     |
| TXNRD1      | CD41+, Cluster B              | Array         |
| UBC         | CD41+, Cluster B              | GeneMANIA     |
| UBE2B       | CD41+, Cluster B              | Array         |
| VIMP        | CD41+, Cluster B              | Array         |
| VRK1        | CD41+, Cluster B              | Array         |
| WBP4        | CD41+, Cluster B              | Array         |
| XRCC5       | CD41+, Cluster B              | Array         |
| APOBEC3G    | CD41+, Cluster C              | Array         |
| BCL6        | CD41+, Cluster C              | Array         |
| BMP7        | CD41+, Cluster C              | Array         |
| CBL         | CD41+, Cluster C              | Array         |
| CD14        | CD41+, Cluster C              | Array         |
| CD38        | CD41+, Cluster C              | Array         |
| CD47        | CD41+, Cluster C              | Array         |
| CSF1R       | CD41+, Cluster C              | GeneMANIA     |
| ECHDC2      | CD41+, Cluster C              | Array         |
| EGFR        | CD41+, Cluster C              | GeneMANIA     |
| ETS2        | CD41+, Cluster C              | Array         |
| GP1BA       | CD41+, Cluster C              | Array         |

| <b>Gene</b> | <b>Category &amp; Cluster</b> | <b>Origin</b> |
|-------------|-------------------------------|---------------|
| GRID2       | CD41+, Cluster C              | Array         |
| HOXC12      | CD41+, Cluster C              | Array         |
| HOXC4       | CD41+, Cluster C              | Array         |
| IGF1R       | CD41+, Cluster C              | GeneMANIA     |
| IL10        | CD41+, Cluster C              | Array         |
| IL10RA      | CD41+, Cluster C              | GeneMANIA     |
| IL6ST       | CD41+, Cluster C              | Array         |
| JAK2        | CD41+, Cluster C              | Array         |
| JUN         | CD41+, Cluster C              | GeneMANIA     |
| KIT         | CD41+, Cluster C              | GeneMANIA     |
| LAMP3       | CD41+, Cluster C              | Array         |
| LIF         | CD41+, Cluster C              | Array         |
| LSP1        | CD41+, Cluster C              | Array         |
| LTF         | CD41+, Cluster C              | Array         |
| MET         | CD41+, Cluster C              | GeneMANIA     |
| OSM         | CD41+, Cluster C              | GeneMANIA     |
| PIK3CG      | CD41+, Cluster C              | Array         |
| PIK3R3      | CD41+, Cluster C              | Array         |
| PRDM1       | CD41+, Cluster C              | Array         |
| PTK2        | CD41+, Cluster C              | GeneMANIA     |
| PTK2B       | CD41+, Cluster C              | GeneMANIA     |
| PTPRC       | CD41+, Cluster C              | Array         |
| SBNO2       | CD41+, Cluster C              | Array         |
| SELPLG      | CD41+, Cluster C              | GeneMANIA     |
| SERTAD1     | CD41+, Cluster C              | Array         |
| SIRPA       | CD41+, Cluster C              | Array         |
| SIRPG       | CD41+, Cluster C              | GeneMANIA     |
| SLC2A3      | CD41+, Cluster C              | Array         |
| SOCS1       | CD41+, Cluster C              | Array         |
| SOCS2       | CD41+, Cluster C              | Array         |
| SOCS3       | CD41+, Cluster C              | Array         |
| SRC         | CD41+, Cluster C              | Array         |
| STAT1       | CD41+, Cluster C              | Array         |

| <b>Gene</b> | <b>Category &amp; Cluster</b> | <b>Origin</b> |
|-------------|-------------------------------|---------------|
| STAT3       | CD41+, Cluster C              | Array         |
| VIP         | CD41+, Cluster C              | Array         |
| ALAS2       | CD41+, Cluster D              | GeneMANIA     |
| ALDOB       | CD41+, Cluster D              | Array         |
| ANK1        | CD41+, Cluster D              | Array         |
| APC         | CD41+, Cluster D              | Array         |
| APOBEC2     | CD41+, Cluster D              | Array         |
| ARRB2       | CD41+, Cluster D              | Array         |
| BCL2L1      | CD41+, Cluster D              | Array         |
| BCR         | CD41+, Cluster D              | Array         |
| CACNA1C     | CD41+, Cluster D              | Array         |
| CAST        | CD41+, Cluster D              | Array         |
| CAT         | CD41+, Cluster D              | GeneMANIA     |
| DCAF11      | CD41+, Cluster D              | Array         |
| DVL1        | CD41+, Cluster D              | GeneMANIA     |
| EPO         | CD41+, Cluster D              | GeneMANIA     |
| EPOR        | CD41+, Cluster D              | Array         |
| FMO1        | CD41+, Cluster D              | Array         |
| FOXO3       | CD41+, Cluster D              | GeneMANIA     |
| FZD1        | CD41+, Cluster D              | Array         |
| FZD6        | CD41+, Cluster D              | Array         |
| GADD45A     | CD41+, Cluster D              | Array         |
| HBZ         | CD41+, Cluster D              | Array         |
| IDH2        | CD41+, Cluster D              | Array         |
| KCNJ13      | CD41+, Cluster D              | Array         |
| KLF1        | CD41+, Cluster D              | Array         |
| MAPK3       | CD41+, Cluster D              | GeneMANIA     |
| MAPK8       | CD41+, Cluster D              | Array         |
| MSRA        | CD41+, Cluster D              | Array         |
| PDK4        | CD41+, Cluster D              | Array         |
| PF4         | CD41+, Cluster D              | Array         |
| PNLIPRP1    | CD41+, Cluster D              | Array         |
| PTPN11      | CD41+, Cluster D              | Array         |

| <b>Gene</b> | <b>Category &amp; Cluster</b> | <b>Origin</b> |
|-------------|-------------------------------|---------------|
| RAF1        | CD41+, Cluster D              | GeneMANIA     |
| SIRT1       | CD41+, Cluster D              | Array         |
| SLC4A1      | CD41+, Cluster D              | Array         |
| SOD2        | CD41+, Cluster D              | Array         |
| SPTB        | CD41+, Cluster D              | Array         |
| STK25       | CD41+, Cluster D              | Array         |
| TAL1        | CD41+, Cluster D              | Array         |
| TFRC        | CD41+, Cluster D              | Array         |
| TMOD1       | CD41+, Cluster D              | Array         |
| TRIM10      | CD41+, Cluster D              | Array         |
| TUBB2A      | CD41+, Cluster D              | Array         |
| WNT5B       | CD41+, Cluster D              | Array         |
| WNT6        | CD41+, Cluster D              | Array         |
| CCL14       | CD41-, Cluster A              | GeneMANIA     |
| CCL15       | CD41-, Cluster A              | GeneMANIA     |
| CCL23       | CD41-, Cluster A              | GeneMANIA     |
| CCR1        | CD41-, Cluster A              | Array         |
| CEBPA       | CD41-, Cluster A              | Array         |
| ELK3        | CD41-, Cluster A              | Array         |
| ENG         | CD41-, Cluster A              | Array         |
| EYA4        | CD41-, Cluster A              | Array         |
| FBXW5       | CD41-, Cluster A              | Array         |
| FOS         | CD41-, Cluster A              | GeneMANIA     |
| FOSL2       | CD41-, Cluster A              | Array         |
| GATA2       | CD41-, Cluster A              | Array         |
| HLX         | CD41-, Cluster A              | Array         |
| ID2         | CD41-, Cluster A              | Array         |
| ITGA5       | CD41-, Cluster A              | Array         |
| ITGB1       | CD41-, Cluster A              | GeneMANIA     |
| JUNB        | CD41-, Cluster A              | Array         |
| MEIS2       | CD41-, Cluster A              | Array         |
| MSC         | CD41-, Cluster A              | GeneMANIA     |
| NRP2        | CD41-, Cluster A              | GeneMANIA     |

| <b>Gene</b> | <b>Category &amp; Cluster</b> | <b>Origin</b> |
|-------------|-------------------------------|---------------|
| PGF         | CD41-, Cluster A              | GeneMANIA     |
| RBPMS       | CD41-, Cluster A              | Array         |
| RHEB        | CD41-, Cluster A              | GeneMANIA     |
| SPP1        | CD41-, Cluster A              | GeneMANIA     |
| TGFB1       | CD41-, Cluster A              | GeneMANIA     |
| THBS2       | CD41-, Cluster A              | Array         |
| THBS3       | CD41-, Cluster A              | Array         |
| TNF         | CD41-, Cluster A              | GeneMANIA     |
| VEGFA       | CD41-, Cluster A              | Array         |
| BUB1        | CD41-, Cluster B              | GeneMANIA     |
| CDK6        | CD41-, Cluster B              | GeneMANIA     |
| CDKN2D      | CD41-, Cluster B              | Array         |
| DDX11       | CD41-, Cluster B              | Array         |
| FEN1        | CD41-, Cluster B              | GeneMANIA     |
| GTSE1       | CD41-, Cluster B              | Array         |
| H2AFX       | CD41-, Cluster B              | GeneMANIA     |
| KDM1A       | CD41-, Cluster B              | Array         |
| LIG1        | CD41-, Cluster B              | Array         |
| MDC1        | CD41-, Cluster B              | Array         |
| NDE1        | CD41-, Cluster B              | Array         |
| PLEKHG6     | CD41-, Cluster B              | Array         |
| POLD1       | CD41-, Cluster B              | GeneMANIA     |
| POLD2       | CD41-, Cluster B              | Array         |
| POLD3       | CD41-, Cluster B              | GeneMANIA     |
| POLD4       | CD41-, Cluster B              | GeneMANIA     |
| PPIA        | CD41-, Cluster B              | GeneMANIA     |
| RAD51C      | CD41-, Cluster B              | GeneMANIA     |
| RAD54B      | CD41-, Cluster B              | Array         |
| RPA1        | CD41-, Cluster B              | GeneMANIA     |
| RPA2        | CD41-, Cluster B              | Array         |
| STC2        | CD41-, Cluster B              | Array         |
| TOMM40      | CD41-, Cluster B              | GeneMANIA     |
| TP53        | CD41-, Cluster B              | GeneMANIA     |

| <b>Gene</b> | <b>Category &amp; Cluster</b> | <b>Origin</b> |
|-------------|-------------------------------|---------------|
| TP53BP1     | CD41-, Cluster B              | GeneMANIA     |
| XRCC3       | CD41-, Cluster B              | Array         |
| ADD1        | CD41-, Cluster C              | GeneMANIA     |
| ATF1        | CD41-, Cluster C              | GeneMANIA     |
| BCL2        | CD41-, Cluster C              | Array         |
| BIK         | CD41-, Cluster C              | GeneMANIA     |
| DPPA4       | CD41-, Cluster C              | Array         |
| EIF4E       | CD41-, Cluster C              | GeneMANIA     |
| GABPA       | CD41-, Cluster C              | Array         |
| GABPB1      | CD41-, Cluster C              | GeneMANIA     |
| HOXC6       | CD41-, Cluster C              | Array         |
| LEF1        | CD41-, Cluster C              | Array         |
| MAP4K5      | CD41-, Cluster C              | Array         |
| MYB         | CD41-, Cluster C              | Array         |
| PELI2       | CD41-, Cluster C              | Array         |
| RAG2        | CD41-, Cluster C              | GeneMANIA     |
| RCOR1       | CD41-, Cluster C              | GeneMANIA     |
| SIM2        | CD41-, Cluster C              | GeneMANIA     |
| SIN3A       | CD41-, Cluster C              | GeneMANIA     |
| SKI         | CD41-, Cluster C              | Array         |
| SMAD4       | CD41-, Cluster C              | GeneMANIA     |
| TCF12       | CD41-, Cluster C              | GeneMANIA     |
| WNT5A       | CD41-, Cluster C              | GeneMANIA     |
| CCS         | CD41-, Cluster D              | GeneMANIA     |
| CDX1        | CD41-, Cluster D              | GeneMANIA     |
| EIF4E1B     | CD41-, Cluster D              | GeneMANIA     |
| EIF4E2      | CD41-, Cluster D              | GeneMANIA     |
| EIF4EBP1    | CD41-, Cluster D              | Array         |
| FKBP8       | CD41-, Cluster D              | GeneMANIA     |
| PFKL        | CD41-, Cluster D              | GeneMANIA     |
| PFKM        | CD41-, Cluster D              | Array         |
| PFKP        | CD41-, Cluster D              | Array         |
| PPP2R4      | CD41-, Cluster D              | Array         |

| <b>Gene</b> | <b>Category &amp; Cluster</b> | <b>Origin</b> |
|-------------|-------------------------------|---------------|
| PRELID1     | CD41-, Cluster D              | Array         |
| RAB24       | CD41-, Cluster D              | Array         |
| RNH1        | CD41-, Cluster D              | GeneMANIA     |
| SREBF1      | CD41-, Cluster D              | GeneMANIA     |
| TBX5        | CD41-, Cluster D              | Array         |
| TPI1        | CD41-, Cluster D              | Array         |
| VEGFB       | CD41-, Cluster D              | GeneMANIA     |
| ANG         | CD41-, Cluster E              | Array         |
| CCNG1       | CD41-, Cluster E              | GeneMANIA     |
| CREBL2      | CD41-, Cluster E              | Array         |
| DERL1       | CD41-, Cluster E              | GeneMANIA     |
| FZD5        | CD41-, Cluster E              | Array         |
| PHF21A      | CD41-, Cluster E              | GeneMANIA     |
| PIM2        | CD41-, Cluster E              | Array         |
| SOD1        | CD41-, Cluster E              | Array         |
| TOMM40L     | CD41-, Cluster E              | GeneMANIA     |

**Supplemental Table 3. Gene sets specifically relevant to P-erymk41(+) and P-erymk41(-) cells.**

“Category & Cluster” shows the group to which genes were categorized by PCA and the following ReactomeFI analysis. “Origin” column indicates 261 genes included in the original gene lists (Supplemental Table 1) and 94 genes complemented by the GeneMANIA network algorithm.



| <b>Gene</b> | <b>Category &amp; Cluster</b> | <b>Origin</b> |
|-------------|-------------------------------|---------------|
| ADAM10      | WT, Cluster A                 | Array         |
| ARNT        | WT, Cluster A                 | Array         |
| CALD1       | WT, Cluster A                 | Array         |
| CEBPD       | WT, Cluster A                 | GeneMANIA     |
| CXCR5       | WT, Cluster A                 | GeneMANIA     |
| DDB2        | WT, Cluster A                 | GeneMANIA     |
| DENND1B     | WT, Cluster A                 | GeneMANIA     |
| DHRS3       | WT, Cluster A                 | GeneMANIA     |
| FHL1        | WT, Cluster A                 | GeneMANIA     |
| HIF1A       | WT, Cluster A                 | GeneMANIA     |
| HK1         | WT, Cluster A                 | GeneMANIA     |
| ICAM4       | WT, Cluster A                 | Array         |
| ID2         | WT, Cluster A                 | GeneMANIA     |
| ID3         | WT, Cluster A                 | Array         |
| ITGA1       | WT, Cluster A                 | GeneMANIA     |
| ITGA5       | WT, Cluster A                 | Array         |
| ITGA7       | WT, Cluster A                 | Array         |
| ITGA9       | WT, Cluster A                 | Array         |
| ITGAL       | WT, Cluster A                 | Array         |
| ITGAV       | WT, Cluster A                 | Array         |
| ITGB1       | WT, Cluster A                 | Array         |
| ITGB3       | WT, Cluster A                 | GeneMANIA     |
| NOTCH2      | WT, Cluster A                 | GeneMANIA     |
| SEMA7A      | WT, Cluster A                 | Array         |
| SRC         | WT, Cluster A                 | Array         |
| TACC1       | WT, Cluster A                 | GeneMANIA     |
| TIE1        | WT, Cluster A                 | GeneMANIA     |
| TNC         | WT, Cluster A                 | GeneMANIA     |
| UBE2B       | WT, Cluster A                 | GeneMANIA     |
| ATF4        | WT, Cluster B                 | Array         |
| BGLAP       | WT, Cluster B                 | Array         |
| CEBPB       | WT, Cluster B                 | GeneMANIA     |
| CREBBP      | WT, Cluster B                 | GeneMANIA     |

|         |               |           |
|---------|---------------|-----------|
| FOXA1   | WT, Cluster B | Array     |
| GCG     | WT, Cluster B | GeneMANIA |
| GLI3    | WT, Cluster B | Array     |
| HDAC1   | WT, Cluster B | GeneMANIA |
| HDAC2   | WT, Cluster B | Array     |
| MAPK10  | WT, Cluster B | GeneMANIA |
| MSI2    | WT, Cluster B | Array     |
| RBPJ    | WT, Cluster B | GeneMANIA |
| RUNX1   | WT, Cluster B | GeneMANIA |
| RUNX1T1 | WT, Cluster B | Array     |
| RUNX3   | WT, Cluster B | GeneMANIA |
| SMAD5   | WT, Cluster B | Array     |
| SON     | WT, Cluster B | GeneMANIA |
| TCF7L2  | WT, Cluster B | GeneMANIA |
| TDRD7   | WT, Cluster B | Array     |
| ADD1    | WT, Cluster C | GeneMANIA |
| AHSG    | WT, Cluster C | Array     |
| ALAD    | WT, Cluster C | Array     |
| BMP6    | WT, Cluster C | GeneMANIA |
| EPO     | WT, Cluster C | Array     |
| EPOR    | WT, Cluster C | GeneMANIA |
| GAB2    | WT, Cluster C | Array     |
| GHR     | WT, Cluster C | GeneMANIA |
| KLF5    | WT, Cluster C | GeneMANIA |
| PDHX    | WT, Cluster C | GeneMANIA |
| PDK2    | WT, Cluster C | Array     |
| SCUBE3  | WT, Cluster C | Array     |
| STAT5A  | WT, Cluster C | GeneMANIA |
| STAT5B  | WT, Cluster C | GeneMANIA |
| UBC     | WT, Cluster C | Array     |
| VNN1    | WT, Cluster C | GeneMANIA |
| ZBTB16  | WT, Cluster C | Array     |
| ASNS    | WT, Cluster D | GeneMANIA |
| BRCA1   | WT, Cluster D | GeneMANIA |

|         |               |           |
|---------|---------------|-----------|
| BRIP1   | WT, Cluster D | GeneMANIA |
| CBFB    | WT, Cluster D | GeneMANIA |
| CKAP5   | WT, Cluster D | GeneMANIA |
| CSNK2A1 | WT, Cluster D | GeneMANIA |
| CSNK2A2 | WT, Cluster D | Array     |
| CSNK2B  | WT, Cluster D | Array     |
| DDB1    | WT, Cluster D | Array     |
| POLR2A  | WT, Cluster D | Array     |
| POLR2B  | WT, Cluster D | Array     |
| POLR2C  | WT, Cluster D | GeneMANIA |
| POLR2J  | WT, Cluster D | Array     |
| RACK1   | WT, Cluster D | GeneMANIA |
| RING1   | WT, Cluster D | Array     |
| TUBB2B  | WT, Cluster D | GeneMANIA |
| WNT6    | WT, Cluster D | Array     |
| ABL1    | MT, Cluster A | GeneMANIA |
| ARRB2   | MT, Cluster A | Array     |
| BNC2    | MT, Cluster A | GeneMANIA |
| CAMK2A  | MT, Cluster A | GeneMANIA |
| CD27    | MT, Cluster A | GeneMANIA |
| CD70    | MT, Cluster A | GeneMANIA |
| CHD7    | MT, Cluster A | Array     |
| CSF3    | MT, Cluster A | Array     |
| CSF3R   | MT, Cluster A | Array     |
| CYTH2   | MT, Cluster A | Array     |
| DNM2    | MT, Cluster A | Array     |
| DOHH    | MT, Cluster A | GeneMANIA |
| DOK1    | MT, Cluster A | GeneMANIA |
| EGFR    | MT, Cluster A | Array     |
| F2R     | MT, Cluster A | Array     |
| FES     | MT, Cluster A | GeneMANIA |
| HOXA2   | MT, Cluster A | Array     |
| HOXB4   | MT, Cluster A | Array     |
| HOXC6   | MT, Cluster A | Array     |

|         |               |           |
|---------|---------------|-----------|
| IPCEF1  | MT, Cluster A | Array     |
| MAP3K3  | MT, Cluster A | Array     |
| MPL     | MT, Cluster A | Array     |
| PDK3    | MT, Cluster A | Array     |
| PIM1    | MT, Cluster A | GeneMANIA |
| SEMA3A  | MT, Cluster A | GeneMANIA |
| SLAMF1  | MT, Cluster A | Array     |
| STAT1   | MT, Cluster A | GeneMANIA |
| TBX5    | MT, Cluster A | Array     |
| THBS2   | MT, Cluster A | Array     |
| THPO    | MT, Cluster A | GeneMANIA |
| TRIM10  | MT, Cluster A | Array     |
| ABCC1   | MT, Cluster B | Array     |
| BCL10   | MT, Cluster B | Array     |
| CARD11  | MT, Cluster B | GeneMANIA |
| CDK5R1  | MT, Cluster B | Array     |
| CDK5R2  | MT, Cluster B | GeneMANIA |
| CDKN1B  | MT, Cluster B | GeneMANIA |
| CSNK1A1 | MT, Cluster B | Array     |
| FOS     | MT, Cluster B | Array     |
| ID1     | MT, Cluster B | Array     |
| JUN     | MT, Cluster B | Array     |
| KDM3A   | MT, Cluster B | GeneMANIA |
| MALT1   | MT, Cluster B | GeneMANIA |
| MYB     | MT, Cluster B | GeneMANIA |
| MYF5    | MT, Cluster B | GeneMANIA |
| MYF6    | MT, Cluster B | Array     |
| MYT1    | MT, Cluster B | Array     |
| NDRG2   | MT, Cluster B | GeneMANIA |
| NFATC2  | MT, Cluster B | Array     |
| PCF11   | MT, Cluster B | Array     |
| PIAS1   | MT, Cluster B | Array     |
| PIN1    | MT, Cluster B | GeneMANIA |
| SIM2    | MT, Cluster B | GeneMANIA |

|         |               |           |
|---------|---------------|-----------|
| SIN3A   | MT, Cluster B | Array     |
| SMAD2   | MT, Cluster B | GeneMANIA |
| TAB2    | MT, Cluster B | Array     |
| TCF12   | MT, Cluster B | GeneMANIA |
| TERT    | MT, Cluster B | GeneMANIA |
| THBS3   | MT, Cluster B | GeneMANIA |
| WHSC1L1 | MT, Cluster B | Array     |
| ANAPC11 | MT, Cluster C | GeneMANIA |
| CCNA2   | MT, Cluster C | GeneMANIA |
| CCNE1   | MT, Cluster C | GeneMANIA |
| CCNH    | MT, Cluster C | Array     |
| CDC16   | MT, Cluster C | Array     |
| CDC26   | MT, Cluster C | GeneMANIA |
| CDK1    | MT, Cluster C | Array     |
| CDK2    | MT, Cluster C | GeneMANIA |
| CDK7    | MT, Cluster C | GeneMANIA |
| CDKN1A  | MT, Cluster C | Array     |
| CUL1    | MT, Cluster C | GeneMANIA |
| DLAT    | MT, Cluster C | Array     |
| EIF5A   | MT, Cluster C | GeneMANIA |
| GSR     | MT, Cluster C | Array     |
| LDHA    | MT, Cluster C | GeneMANIA |
| LDHB    | MT, Cluster C | Array     |
| MNAT1   | MT, Cluster C | Array     |
| NHP2    | MT, Cluster C | GeneMANIA |
| NPM1    | MT, Cluster C | GeneMANIA |
| SKP1    | MT, Cluster C | GeneMANIA |
| SKP2    | MT, Cluster C | Array     |
| CDK5    | MT, Cluster D | GeneMANIA |
| DDX11   | MT, Cluster D | GeneMANIA |
| DHPS    | MT, Cluster D | Array     |
| H2AFX   | MT, Cluster D | GeneMANIA |
| MAP2K5  | MT, Cluster D | GeneMANIA |
| MDC1    | MT, Cluster D | GeneMANIA |

|         |               |           |
|---------|---------------|-----------|
| NPM3    | MT, Cluster D | GeneMANIA |
| PKMYT1  | MT, Cluster D | GeneMANIA |
| POLD1   | MT, Cluster D | GeneMANIA |
| POLD2   | MT, Cluster D | Array     |
| RAD51   | MT, Cluster D | Array     |
| RAD52   | MT, Cluster D | GeneMANIA |
| RPA1    | MT, Cluster D | Array     |
| RPA2    | MT, Cluster D | Array     |
| RPA3    | MT, Cluster D | Array     |
| TP53    | MT, Cluster D | Array     |
| TP53BP1 | MT, Cluster D | Array     |
| WRAP53  | MT, Cluster D | Array     |
| CEP57   | MT, Cluster E | Array     |
| DCTN2   | MT, Cluster E | Array     |
| DERA    | MT, Cluster E | Array     |
| NEK6    | MT, Cluster E | Array     |

**Supplemental Table 4. Gene sets specifically relevant to P-erymk41(-) from WT- and G1s-clones.**

“Category & Cluster” shows the group to which genes were categorized by PCA and the following ReactomeFI analysis. “Origin” column indicates 103 genes included in the original gene lists (Supplemental Table 1) and 91 genes complemented by the GeneMANIA network algorithm.

## **Acknowledgements**

We are grateful to Ms. Setsuko Inoue and Mr. Hirotsuna Watanabe for their technical assistance. We would also like to thank Dr. Mitsujiro Osawa, Dr. Ritsuko Shimizu, and Dr. Tutomu Toki for providing helpful scientific comments, Ms. Harumi Watanabe for providing administrative assistance, and Dr. Peter Karagiannis for proofreading the paper. This work was supported by grants from the Ministry of Health, Labour and Welfare of Japan, Ministry of Education, Culture, Sports, Science and Technology of Japan, Japan Society for the Promotion of Science (JSPS) Research Fellowships for Young Scientists [Y.N.A], KAKENHI Grant Number 19K17358 [Y.N.A.], KAKENHI Grant Number 25221308 [M.O.] and KAKENHI Grant Number 16K10026 [A.N.], Regional Innovation Support Program from the Ministry of Education, Culture, Sports, Science and Technology of Japan [M.O. and Y.K.], the Leading Project of the Ministry of Education, Culture, Sports, Science and Technology [T.N.], the Funding Program for World-Leading Innovative Research and Development on Science and Technology of the Japan Society for the Promotion of Science [T.N. and M.K.S.], CREST [T.N.], the Core Center for iPS Cell Research of Research Center Network for Realization of Regenerative Medicine from the Japan Agency for Medical Research and Development (AMED) [T.N. and M.K.S.], the Program for Intractable Diseases Research utilizing Disease-specific iPS cells of AMED (17935423) [Y.N.A., T.N. and M.K.S.], and Practical Research Project for Rare/Intractable Diseases of AMED (17930095) [M.K.S.].
